# Supplementary material for: Global Systems-Level Analysis of Hfq and SmpB Deletion Mutants in Salmonella: Implications for Virulence and Global Protein Translation
Source: PLoS One. 2009 Mar 11;4(3):e4809. doi: 10.1371/journal.pone.0004809 (PMC2652828; doi:10.1371/journal.pone.0004809)
Supplement: Table S2 — List of proteins that overlap between Hfq-regulated proteins and Hfq-associated mRNAs. (0.07 MB XLS) [file pone.0004809.s002.xls]

## Sheet: Index
Sheet Number	Contents
1	Hfq-associated mRNA identified by Sittka et al. (2008) observed in the present study
2	Overlap between Hfq-dependent proteins and Hfq-associated mRNA

## Sheet: 1. Hfq_assoc. mRNA observed
Protein	Gene name	Description
STM4261		putative inner membrane protein
STM2665	yfiA	ribosome stabilization factor
STM1377	lpp	murein lipoprotein
STM1959	fliC	flagellar biosynthesis protein
STM2267	ompC	outer membrane protein C precursor
STM2882	sipA	secreted effector protein
STM2885	sipB	translocation machinery component
STM4326	aspA	aspartate ammonia-lyase
STM4086	glpK	glycerol kinase
STM0739	sucD	succinyl-CoA synthetase alpha subunit
STM1572	ompD	putative outer membrane porin precursor
STM2898	invG	outer membrane secretin precursor
STM1091	sopB	secreted effector protein
STM1732	ompW	outer membrane protein W precursor
STM0451	hupB	DNA-binding protein HU-beta
STM2871	prgK	needle complex inner membrane lipoprotein
STM2884	sipC	translocation machinery component
STM2869	orgB	needle complex export protein
STM2878	sptP	protein tyrosine phosphatase/GTPase activating protein
STM2284	glpA	sn-glycerol-3-phosphate dehydrogenase large subunit
STM3138		putative methyl-accepting chemotaxis protein
STM0833	ompX	outer membrane protein X
STM0629	cspE	cold shock protein E
STM0736	sucA	2-oxoglutarate dehydrogenase
STM2445	ucpA	short chain dehydrogenase
STM1070	ompA	putative hydrogenase membrane component precurosr
STM2282	glpQ	periplasmic glycerophosphodiester phosphodiesterase
STM3500	pckA	phosphoenolpyruvate carboxykinase
STM0748	tolB	translocation protein TolB precursor
STM0737	sucB	dihydrolipoamide acetyltransferase
STM0738	sucC	succinyl-CoA synthetase subunit beta
STM1919	cheM	methyl accepting chemotaxis protein II
STM0740	cydA	cytochrome d terminal oxidase polypeptide subunit I
STM3630	dppA	dipeptide transport protein
STM0945	clpA	ATP-binding subunit of serine protease
STM1921	cheA	chemotaxis sensory histidine protein kinase
STM2895	invB	secretion chaperone
STM1230	phoQ	sensor kinase protein
STM1751	hns	DNA-binding protein HLP-II
STM1922	motB	flagellar motor protein
STM4232	malM	periplasmic protein precursor
STM4258		putative methyl-accepting chemotaxis protein
STM1431	sodB	superoxide dismutase
STM3053	gcvP	glycine dehydrogenase
STM3466	crp	catabolite activator protein
STM1285	yeaG	putative serine protein kinase
STM1311	osmE	transcriptional activator
STM1203	ptsG	glucose-specific IIBC component
STM2065	phsA	thiosulfate reductase precursor
STM2873	prgI	needle complex major subunit
STM4151	rplJ	50S ribosomal protein L10
STM0617	rna	RNase I
STM1231	phoP	response regulator
STM4152	rplL	50S ribosomal protein L7/L12
STM0158	acnB	aconitate hydratase
STM1917	cheB	chemotaxis-specific methylesterase
STM2081	gnd	6-phosphogluconate dehydrogenase
STM2326	nuoC	NADH dehydrogenase I chain C/D
STM2827	alaS	alanyl-tRNA synthetase
STM3106	ansB	periplasmic L-asparaginase II
STM1960	fliD	flagellar hook-associated protein
STM0831	dps	DNA protection during starvation conditions
STM1057	pepN	aminopeptidase N
STM3359	mdh	malate dehydrogenase
STM0994	mukB	condesin subunit B
STM2660	clpB	ATP-dependent protease
STM3884	rbsB	D-ribose transport protein
STM0129	murC	UDP-N-acetylmuramate--L-alanine ligase
STM1165	grxB	glutaredoxin 2
STM1742	oppF	oligopeptide transport protein
STM1238	icdA	isocitrate dehydrogenase
STM1333	thrS	threonyl-tRNA synthetase
STM3430	rplN	50S ribosomal protein L14
STM3445	tuf	elongation factor Tu
STM2956	relA	(p)ppGpp synthetase I
STM4154	rpoC	DNA-directed RNA polymerase beta' subunit
STM4237	lexA	LexA repressor
STM0964	dmsA	anaerobic dimethyl sulfoxide reductase subunit A
STM0614	ybdQ	putative universal stress protein
STM1837	cspC	cold shock protein
STM3577	tcp	methyl-accepting transmembrane citrate/phenol chemoreceptor
STM2432	ptsI	PEP-protein phosphotransferase
STM4582	slt	soluble lytic murein transglycosylase
STM0093	imp	organic solvent tolerance protein precursor
STM0224	yaeT	putative outer membrane protein precursor
STM1888	pykA	pyruvate kinase
STM3705	yibP	hypothetical protein
STM0120	mraW	S-adenosyl-methyltransferase
STM4153	rpoB	DNA-directed RNA polymerase beta subunit
STM0800	slrP	leucine-rich repeat protein
STM2532		putative inner membrane lipoprotein
STM3055	gcvT	aminomethyltransferase
STM3865	atpD	ATP synthase subunit B
STM4561	osmY	hyperosmotically-inducible periplasmic protein
STM0226	lpxD	UDP-3-O-[3-hydroxymyristoyl] glucosamine N-acyltransferase
STM0366	yahO	putative periplasmic protein
STM0734	sdhA	succinate dehydrogenase catalytic subunit
STM1290	gapA	glyceraldehyde-3-phosphate dehydrogenase
STM3216		putative methyl-accepting chemotaxis protein
STM1196	acpP	acyl carrier protein
STM1318	katE	hydroperoxidase HPII
STM1324		putative cytoplasmic protein
STM1338	pheT	phenylalanyl-tRNA synthetase beta subunit
STM1661	ydaA	putative universal stress protein
STM3701	secB	export protein SecB
STM3968	udp	uridine phosphorylase
STM4343	frdA	fumarate reductase
STM1349	pps	phosphoenolpyruvate synthase
STM4170	hupA	DNA-binding protein HU-alpha
STM4368	vacB	putative exoribonuclease
STM0735	sdhB	succinate dehydrogenase catalytic subunit
STM0863	dacC	D-alanyl-D-alanine carboxypeptidase
STM1000	asnS	asparaginyl-tRNA synthetase
STM1749	adhE	iron-dependent alcohol dehydrogenase
STM1920	cheW	chemotaxis docking protein
STM2083	rfbK	phosphomannomutase
STM2327	nuoB	NADH dehydrogenase beta subunit
STM2526	ndk	nucleoside diphosphate kinase
STM2651	yfiQ	putative acetyl-CoA synthetase
STM3591	uspA	universal stress protein A
STM3702	grxC	glutaredoxin 3
STM3972	aarF	putative ubiquinone biosynthesis protein UbiB
STM0186	dksA	dnaK suppressor protein
STM0452	cypD	peptidyl-prolyl isomerase
STM0730	gltA	citrate synthase
STM2091	rfbG	CDP glucose 4,6-dehydratase
STM4410	ytfN	putative periplasmic protein
STM1286	mipA	MltA-interacting protein A
STM1291	yeaA	methionine sulfoxide reductase B
STM1683	tyrR	transcriptional regulator
STM1795		putative glutamic dehyrogenase-like protein
STM1916	cheY	chemotaxis regulator
STM2391	fadL	outer membrane-bound fatty acid transporter
STM3147	hybC	hydrogenase-2 large subunit
STM3282	pnp	polynucleotide phosphorylase
STM3415	rpoA	DNA-directed RNA polymerase alpha subunit
STM3417	rpsK	30S ribosomal protein S11
STM4240	yjbJ	putative cytoplasmic protein
STM4330	groEL	chaperonin GroEL
STM0653	ybeL	putative cytoplasmic protein
STM1713	cysB	transcriptional regulator for cysteine regulon
STM2533	sseA	putative sulfurtransferase
STM3538	glgB	glycogen branching enzyme
STM3708	tdh	L-threonine 3-dehydrogenase
STM3710	rfaD	ADP-L-glycero-D-mannoheptose-6-epimerase
STM0133	ftsZ	cell division protein FtsZ
STM0449	clpX	ATP-dependent protease ATP-binding subunit
STM1796	treA	trehalase
STM2059	yeeX	hypothetical protein
STM2433	crr	glucose-specific PTS system enzyme IIA component
STM2681	grpE	heat shock protein
STM3426	rpsH	30S ribosomal protein S8
STM4391	rpsF	30S ribosomal protein S6
STM0959	lrp	leucine-responsive regulatory protein
STM2640	rpoE	RNA polymerase sigma-70 factor
STM2945	sopD	secreted effector protein
STM3186	tolC	outer membrane channel precursor protein
STM3229	yqjD	putative inner membrane protein
STM3272	yhbS	putative transport protein
STM3286	infB	translation initiation factor IF-2
STM3434	rpsC	30S ribosomal protein S3
STM3680	aldB	aldehyde dehydrogenase B
STM3867	atpA	ATP synthase subunit A
STM4078	yneB	hypothetical protein
STM0211	yaeH	putative cytoplasmic protein
STM0465	ybaY	hypothetical protein
STM0772	gpmA	phosphoglyceromutase
STM1177	flgE	flagellar hook protein
STM1444	slyA	transcriptional regulator SlyA
STM1626	trg	methyl-accepting chemotaxis protein III
STM1638		putative SAM-dependent methyltransferase
STM1830	manX	mannose-specific enzyme IIAB
STM3069	pgk	phosphoglycerate kinase
STM3188	ygiC	putative glutathionylspermidine synthase
STM3228	yqjC	putative periplasmic protein
STM3407	fmt	methionyl-tRNA formyltransferase
STM3436	rpsS	30S ribosomal protein S19
STM3440	rplC	50S ribosomal protein L3
STM3885	rbsK	ribokinase
STM0228	lpxA	UDP-N-acetylglucosamine acyltransferase
STM0448	clpP	ATP-dependent Clp protease proteolytic subunit
STM1227	pepT	peptidase T
STM1328		putative outer membrane protein
STM1682	tpx	thiol peroxidase
STM1915	cheZ	chemotactic response protein
STM2259	napA	periplasmic nitrate reductase
STM2299	yfbG	hypothetical protein
STM2337	ackA	acetate/propionate kinase
STM2652	pssA	phosphatidylserine synthase
STM3068	fba	fructose-bisphosphate aldolase
STM3728	rpmB	50S ribosomal protein L28
STM3917	rho	transcription termination factor Rho
STM4512	iadA	isoaspartyl dipeptidase
STM4541	mdoB	phosphoglycerol transferase I
STM0012	dnaK	molecular chaperone DnaK
STM0126	murD	UDP-N-acetylmuramoyl-L-alanyl-D-glutamate synthetase
STM1445	slyB	putative outer membrane lipoprotein
STM1463	add	adenosine deaminase
STM1641	hrpA	ATP-dependent helicase
STM1651	nifJ	putative pyruvate-flavodoxin oxidoreductase
STM2084	rfbM	mannose-1-phosphate guanylyltransferase
STM2472	maeB	phosphate acetyltransferase
STM2646	yfiD	putative formate acetyltransferase
STM2952	eno	phosphopyruvate hydratase
STM3054	gcvH	glycine cleavage system protein H
STM3209	rpsU	30S ribosomal protein S21
STM3416	rpsD	30S ribosomal protein S4
STM3418	rpsM	30S ribosomal protein S13
STM3446	fusA	elongation factor EF-2
STM3999	polA	DNA polymerase I
STM0417	ribH	riboflavin synthase subunit beta
STM0665	gltI	glutamate/aspartate transporter
STM0694	fldA	flavodoxin
STM0963	serS	seryl-tRNA synthetase
STM1589	yncB	putative NADP-dependent oxidoreductase
STM1712	acnA	aconitate hydratase
STM1731		putative catalase
STM1845	prc	carboxy-terminal protease
STM2090	rfbH	CDP-6-deoxy-D-xylo-4-hexulose-3-dehydrase
STM2297	yfbE	4-amino-4-deoxy-L-arabinose lipopolysaccharide-modifying enzyme
STM2298	pmrF	putative glycosyl transferase
STM2489	dapA	dihydrodipicolinate synthase
STM2829	recA	recombinase A
STM3058	pepP	proline aminopeptidase P II
STM3149	hybA	putative hydrogenase-2 component
STM3342	sspA	stringent starvation protein A
STM3534	glgP	glycogen phosphorylase
STM4089	menG	ribonuclease activity regulator protein RraA
STM4409	ytfM	putative outer membrane protein
STM4586	rob	transcriptional regulator
STM0791	hutH	histidine ammonia-lyase
STM1679	mppA	periplasmic murein tripeptide transport protein
STM1881	yebF	putative periplasmic protein
STM1886	zwf	glucose-6-phosphate 1-dehydrogenase
STM1935	ftn	cytoplasmic ferritin
STM2080	udg	UDP-glucose/GDP-mannose dehydrogenase
STM2324	nuoF	NADH dehydrogenase I chain F
STM2677	ffh	4.5S-RNP protein
STM3157	yghA	oxidoreductase
STM3296	hflB	ATP-dependent zinc-metallo protease
STM3368	tldD	microcin B17-processing protein
STM3536	glgC	glucose-1-phosphate adenylyltransferase
STM4275	acs	acetyl-coenzyme A synthetase
STM4367	yjeB	putative negative regulator
STM4404	cysQ	sulfite biosynthetic protein
STM0216	rpsB	30S ribosomal protein S2
STM0217	tsf	elongation factor Ts
STM0450	lon	ATP-dependent protease Lon
STM0669	phoL	putative phosphate starvation-inducible protein
STM0683	nagA	N-acetylglucosamine-6-phosphate deacetylase
STM0934	ltaA	L-allo-threonine aldolase
STM1119	wraB	TrpR binding protein WrbA
STM1246	pagC	virulence membrane protein PAGC precursor
STM1511	ydfG	putative oxidoreductase
STM1558		putative glycosyl hydrolase
STM1743	oppD	oligopeptide transporter ATP-binding component
STM1752	galU	glucose-1-phosphate uridylyltransferase
STM2378	fabB	3-oxoacyl-(acyl carrier protein) synthase
STM3040	lysS	lysyl-tRNA synthetase
STM3107	yggN	putative periplasmic protein
STM3201	glnE	adenylyl transferase for glutamine synthetase
STM3441	rpsJ	30S ribosomal protein S10
STM3453	fkpA	FKBP-type peptidyl-prolyl cis-trans isomerase
STM4249	aphA	non-specific acid phosphatase/phosphotransferase
STM0046	ileS	isoleucyl-tRNA synthetase
STM0475	acrB	acridine efflux pump
STM0476	acrA	acridine efflux pump
STM0648	leuS	leucyl-tRNA synthetase
STM0685	nagE	N-acetylglucosamine-specific enzyme IIABC
STM0781	modA	molybdate transporter
STM0941	ybjY	hypothetical protein
STM0977	serC	phosphoserine aminotransferase
STM1147		hypothetical protein
STM1185	rne	RNase E
STM1195	fabG	3-ketoacyl-(acyl-carrier-protein) reductase
STM1468	fumA	fumarase A
STM2066	sopA	secreted effector protein
STM2165	yehZ	putative transport protein
STM2494		hypothetical protein
STM2536	pepB	aminopeptidase B
STM3421	rplO	50S ribosomal protein L15
STM3428	rplE	50S ribosomal protein L5
STM3481	trpS	tryptophanyl-tRNA synthetase
STM3915	trxA	thioredoxin
STM3938	hemC	porphobilinogen deaminase
STM3978	yigC	putative oxidoreductase
STM4062	pfkA	6-phosphofructokinase
STM4221	pgi	glucose-6-phosphate isomerase
STM4334	efp	elongation factor P
STM4416	mpl	UDP-N-acetylmuramate/L-alanyl-gamma-D-glutamyl-meso-diaminopimelate ligase
STM4533	tsr	methyl-accepting chemotaxis protein I
STM0318	yafA	hypothetical protein
STM0407	secD	protein export protein SecD
STM0494	ushA	UDP-sugar hydrolase/5'-nucleotidase
STM0890	artI	arginine transport system
STM1297	selD	selenophosphate synthetase
STM1433	ydhD	putative glutaredoxin protein
STM1714	topA	DNA topoisomerase I
STM1815	minD	cell division inhibitor protein
STM2039	pudB	polyhedral body protein
STM2190	mglB	galactose transport protein
STM2523	gcpE	4-hydroxy-3-methylbut-2-en-1-yl diphosphate synthase
STM2524	yfgA	hypothetical protein
STM3195	ribB	3,4-dihydroxy-2-butanone 4-phosphate synthase
STM3341	sspB	stringent starvation protein B
STM3423	rpsE	30S ribosomal protein S5
STM3439	rplD	50S ribosomal protein L4
STM3570	ftsE	putative cell division ATPase
STM3594	prlC	oligopeptidase A
STM4091	hslU	ATP-dependent protease ATP-binding subunit
STM4403	cpdB	2',3'-cyclic nucleotide 2'-phosphodiesterase/3'-nucleotidase bifunctional periplasmic precursor protein
STM4438	pmbA	putative antibiotic maturation protein

## Sheet: 2. co-IP_MS_overlap
Protein	Gene name	Description	hfq	wt	Fold Change
STM1558		putative glycosyl hydrolase	14.3424	23.839	-9.49662
STM1731		putative catalase	19.2325	27.9181	-8.68559
STM3229	yqjD	putative inner membrane protein	20.0715	28.382	-8.31049
STM4533	tsr	methyl-accepting chemotaxis protein I	12.4093	20.2258	-7.81649
STM0318	yafA	hypothetical protein	11.4947	18.4953	-7.00064
STM1920	cheW	chemotaxis docking protein	11.2581	18.1977	-6.9396
STM2165	yehZ	putative transport protein	16.0433	22.8139	-6.77055
STM3186	tolC	outer membrane channel precursor protein	15.131	21.7115	-6.58058
STM0476	acrA	acridine efflux pump	12.7706	19.3473	-6.57665
STM4438	pmbA	putative antibiotic maturation protein	14.5858	20.747	-6.16127
STM3157	yghA	oxidoreductase	20.8912	26.7137	-5.82249
STM2524	yfgA	hypothetical protein	13.0348	18.5833	-5.5485
STM1589	yncB	putative NADP-dependent oxidoreductase	18.544	24.0469	-5.50296
STM2327	nuoB	NADH dehydrogenase beta subunit	12.055	17.0398	-4.98474
STM2871	prgK	needle complex inner membrane lipoprotein	17.8314	22.651	-4.81958
STM1638		putative SAM-dependent methyltransferase	15.062	19.7304	-4.6684
STM0465	ybaY	hypothetical protein	23.6654	28.3309	-4.66551
STM4561	osmY	hyperosmotically-inducible periplasmic protein	24.7022	29.1912	-4.48899
STM1796	treA	trehalase	21.1227	25.4465	-4.32381
STM1959	fliC	flagellar biosynthesis protein	22.4595	26.561	-4.10155
STM4541	mdoB	phosphoglycerol transferase I	10.0498	14.074	-4.02413
STM3209	rpsU	30S ribosomal protein S21	17.2989	21.2993	-4.00047
STM3570	ftsE	putative cell division ATPase	15.6047	19.5511	-3.94638
STM1919	cheM	methyl accepting chemotaxis protein II	19.7211	23.4084	-3.68732
STM1119	wraB	TrpR binding protein WrbA	20.4762	24.0928	-3.61661
STM1960	fliD	flagellar hook-associated protein	10.0498	13.6604	-3.61054
STM4258		putative methyl-accepting chemotaxis protein	15.2663	18.8763	-3.60998
STM0407	secD	protein export protein SecD	19.3163	22.9137	-3.59748
STM2873	prgI	needle complex major subunit	18.9095	22.4376	-3.52809
STM4221	pgi	glucose-6-phosphate isomerase	21.0559	24.4243	-3.3684
STM4368	vacB	putative exoribonuclease	17.7159	21.0731	-3.35715
STM3417	rpsK	30S ribosomal protein S11	21.82	25.1425	-3.32255
STM1318	katE	hydroperoxidase HPII	21.012	24.3232	-3.31126
STM3430	rplN	50S ribosomal protein L14	20.8998	24.0699	-3.17006
STM4240	yjbJ	putative cytoplasmic protein	23.2565	26.4252	-3.16868
STM1165	grxB	glutaredoxin 2	22.7482	25.901	-3.15283
STM1177	flgE	flagellar hook protein	10.0498	13.1675	-3.11769
STM3972	aarF	putative ubiquinone biosynthesis protein UbiB	11.3494	14.4667	-3.11723
STM1749	adhE	iron-dependent alcohol dehydrogenase	24.0939	26.8537	-2.75986
STM0831	dps	DNA protection during starvation conditions	23.5767	26.1989	-2.62222
STM0800	slrP	leucine-rich repeat protein	19.6388	21.9869	-2.34811
STM3538	glgB	glycogen branching enzyme	15.9903	18.1621	-2.1718
STM3069	pgk	phosphoglycerate kinase	23.6695	25.8122	-2.1426
STM4062	pfkA	6-phosphofructokinase	23.3442	25.2911	-1.94694
STM3434	rpsC	30S ribosomal protein S3	23.2035	24.9903	-1.78675
STM2952	eno	phosphopyruvate hydratase	24.7107	26.4731	-1.76242
STM0737	sucB	dihydrolipoamide acetyltransferase	22.0865	23.7845	-1.69795
STM3416	rpsD	30S ribosomal protein S4	22.6064	24.168	-1.56155
STM3441	rpsJ	30S ribosomal protein S10	22.275	23.8272	-1.55217
STM3865	atpD	ATP synthase subunit B	24.7359	26.281	-1.54509
STM3867	atpA	ATP synthase subunit A	23.5117	24.9823	-1.47061
STM4404	cysQ	sulfite biosynthetic protein	20.4767	21.9331	-1.45638
STM3418	rpsM	30S ribosomal protein S13	22.9288	24.38	-1.45118
STM1712	acnA	aconitate hydratase	23.9781	25.1655	-1.18735
STM4330	groEL	chaperonin GroEL	25.6704	26.6977	-1.0273
STM3917	rho	transcription termination factor Rho	21.3899	22.3987	-1.00882
STM0451	hupB	DNA-binding protein HU-beta	26.9358	25.9757	0.960153
STM3054	gcvH	glycine cleavage system protein H	24.6389	23.2111	1.42774
STM1433	ydhD	putative glutaredoxin protein	20.9504	18.6609	2.28944
STM2882	sipA	secreted effector protein	21.6685	19.328	2.34055
STM1444	slyA	transcriptional regulator SlyA	23.8155	21.4556	2.3599
STM3630	dppA	dipeptide transport protein	25.3868	22.9731	2.41375
STM3053	gcvP	glycine dehydrogenase	23.4565	20.9803	2.4762
STM1888	pykA	pyruvate kinase	23.9858	21.5066	2.47911
STM2190	mglB	galactose transport protein	26.0604	23.3371	2.72324
STM2494		hypothetical protein	20.3815	17.3243	3.05722
STM2083	rfbK	phosphomannomutase	20.1384	16.8773	3.26109
STM4403	cpdB	2',3'-cyclic nucleotide 2'-phosphodiesterase/3'-nucleotidase bifunctional periplasmic precursor protein	22.9681	19.6194	3.3487
STM0941	ybjY	hypothetical protein	19.8718	16.3407	3.53116
STM1231	phoP	response regulator	25.8856	22.3427	3.54289
STM1468	fumA	fumarase A	21.5329	17.9557	3.57715
STM2297	yfbE	4-amino-4-deoxy-L-arabinose lipopolysaccharide-modifying enzyme	24.2253	20.6192	3.60607
STM2282	glpQ	periplasmic glycerophosphodiester phosphodiesterase	21.6178	17.8307	3.78704
STM1682	tpx	thiol peroxidase	27.6321	23.6761	3.95607
STM1743	oppD	oligopeptide transporter ATP-binding component	23.3593	19.097	4.26232
STM2299	yfbG	hypothetical protein	19.5908	15.263	4.32782
STM0617	rna	RNase I	21.2312	16.5356	4.69551
STM4086	glpK	glycerol kinase	22.9949	17.3443	5.65067
STM4410	ytfN	putative periplasmic protein	16.6003	10.6672	5.93306
STM3107	yggN	putative periplasmic protein	24.2248	17.551	6.67375
STM3453	fkpA	FKBP-type peptidyl-prolyl cis-trans isomerase	27.902	21.1689	6.73311
STM0226	lpxD	UDP-3-O-[3-hydroxymyristoyl] glucosamine N-acyltransferase	18.2605	10.196	8.06455
STM3885	rbsK	ribokinase	19.8632	11.3321	8.53109
STM4249	aphA	non-specific acid phosphatase/phosphotransferase	27.411	18.0793	9.33169
