# Supplementary material for: Global Systems-Level Analysis of Hfq and SmpB Deletion Mutants in Salmonella: Implications for Virulence and Global Protein Translation
Source: PLoS One. 2009 Mar 11;4(3):e4809. doi: 10.1371/journal.pone.0004809 (PMC2652828; doi:10.1371/journal.pone.0004809)
Supplement: Table S4 — List of gene transcripts (RNA) regulated by Hfq and gene transcripts (RNA) regulated by SmpB under the growth conditions examined. (0.23 MB XLS) [file pone.0004809.s004.xls]

## Sheet: Index
Sheet Number	Contents
1	Salmonella Typhimurium 14028 genes differentially regulated by Hfq across all the four growth conditions sampled
2	Genes regulated by Hfq under acidic minimal media 1 (AMM-1) condition
3	Genes regulated by Hfq under AMM-2 condition
4	Genes regulated by Hfq under LB_Stat condition
5	Genes regulated by Hfq under LB_Log condition
6	Salmonella Typhimurium 14028 genes differentially regulated by SmpB across all the four growth conditions sampled
7	Genes regulated by SmpB under acidic minimal media 1 (AMM-1) condition
8	Genes regulated by SmpB under AMM-2 condition
9	Genes regulated by SmpB under LB_Stat condition
10	Genes regulated by SmpB under LB_Log condition

## Sheet: 1.Hfq_regulated_genes
Name	STM Gene type	STM Gene symbol	STM Function
CHIP7_STM1120	pseudogene	ycdF	pseudogene; in-frame stops following codons 5 and 21
CHIP7_STM2693	RNA	10Sa	regulatory RNA
CHIP7_STM2778	pseudogene		pseudogene; frameshift
CHIP7_STM3916	pseudogene	rhoL	pseudogene; no in-frame start
STM_PSLT015	CDS	orf5	putative outer membrane protein
STM_PSLT046	CDS		putative carbonic anhydrase
STM_PSLT051	CDS		putative cytoplasmic protein
STM_PSLT085	CDS	traR	conjugative transfer
STM_PSLT089	CDS	trbI	conjugative transfer
STM_PSLT091	CDS	traW	conjugative transfer: assembly
STM_sRNA_Alpha_RBS
STM_sRNA_Cobalamin A
STM_sRNA_CsrB	RNA	csrB	regulatory RNA
STM_sRNA_RFN
STM_sRNA_rne5	pseudogene		pseudogene; in-frame stop following codon 97; no start near coli start
STM_sRNA_SraC_RyeA	CDS		putative cytoplasmic protein
STM_sRNA_SraH
STM_sRNA_SraJ
STM_sRNA_t44
STM_sRNA_THI
STM0013	CDS	dnaJ	heat shock protein, DnaJ and GrpE stimulates ATPase activity of DnaK
STM0080	CDS		putative outer membrane lipoprotein
STM0081	CDS		putative secreted protein
STM0082	CDS		putative secreted protein
STM0084	CDS		putative sulfatase
STM0089	CDS	apaG	putative cytoplasmic protein
STM0119	CDS	yabB	putative cytoplasmic protein
STM0185	CDS	yadB	putative glutamyl t-RNA synthetase
STM0186	CDS	dksA	dnaK suppressor protein
STM0216	CDS	rpsB	30S ribosomal subunit protein S2
STM0225	CDS	hlpA	histone-like protein, located in outer membrane
STM0227	CDS	fabZ	(3R)-hydroxymyristol acyl carrier protein dehydratase
STM0256	CDS	yafC	putative transcriptional regulator, LysR family
STM0307	CDS		homology to Shigella VirG protein
STM0346	CDS		putative outer membrane protein; homologue of ail and ompX
STM0359	CDS		putative cytoplasmic protein
STM0362	CDS		putative cytoplasmic protein
STM0383	CDS	yaiB	putative cytoplasmic protein
STM0384	CDS	psiF	induced by phosphate starvation
STM0417	CDS	ribH	riboflavin synthase, beta chain
STM0423	CDS	ispA	geranyltranstransferase (farnesyldiphosphate synthase)
STM0440	CDS	cyoD	cytochrome o ubiquinol oxidase subunit IV
STM0441	CDS	cyoC	cytochrome o ubiquinol oxidase subunit III
STM0442	CDS	cyoB	cytochrome o ubiquinol oxidase subunit I
STM0465	CDS	ybaY	glycoprotein/polysaccharide metabolism
STM0466	CDS	ybaZ	putative methyltransferase
STM0473	CDS	hha	hemolysin expression modulating protein (involved in environmental regulation of virulence factors)
STM0474	CDS	ybaJ	putative cytoplasmic protein
STM0485	CDS	ybaB	putative cytoplasmic protein
STM0536	CDS	ppiB	peptidyl-prolyl cis-trans isomerase B (rotamase B)
STM0552	CDS	fimW	putative fimbrial protein
STM0581	CDS		putative regulatory protein
STM0602	CDS	ybdH	putative glycerol dehydrogenase
STM0616	CDS	rnk	regulator of nucleoside diphosphate kinase
STM0617	CDS	rna	RNase I, cleaves phosphodiester bond between any two nucleotides
STM0628	CDS	pagP	PhoPQ-activated gene
STM0629	CDS	cspE	RNA chaperone, negative regulator of cspA transcription
STM0636	CDS	ybeD	putative cytoplasmic protein
STM0665	CDS	gltI	ABC superfamily (bind_prot), glutamate/aspartate transporter
STM0687	CDS	ybfM	putative outer membrane protein
STM0688	CDS	ybfN	putative lipoprotein
STM0697	CDS	seqA	negative modulator of initiation of replication, inhibits open complex formation, mutation in gene alters cell membrane
STM0702	CDS	kdpE	response regulator in two-component regulatory system with KdpD, regulates kdp operon encoding a high-affinity K translocating ATPase (OmpR family)
STM0708	CDS	ybfA	putative periplasmic protein
STM0731	CDS		putative inner membrane protein
STM0732	CDS	sdhC	succinate dehydrogenase, cytochrome b556
STM0735	CDS	sdhB	succinate dehydrogenase, Fe-S protein
STM0744	CDS	ybgC	putative esterase
STM0746	CDS	tolR	tol protein, role in outer membrane integrity, uptake of group A colicins (TonB independent), and translocation of phage DNA to cytoplasm
STM0759	CDS	ybgS	putative homeobox protein
STM0780	CDS		putative outer membrane or exported
STM0797	CDS	bioD	dethiobiotin synthetase
STM0807	CDS	ybhL	putative permease
STM0814	CDS	ybhQ	putative inner membrane protein
STM0823	CDS	ybiJ	putative periplasmic protein
STM0831	CDS	dps	stress response DNA-binding protein; starvation induced resistance to H2O2
STM0833	CDS	ompX	outer membrane protease, receptor for phage OX2
STM0853	CDS	yliH	putative cytoplasmic protein
STM0854	CDS		putative cytoplasmic protein
STM0940	CDS	ybjX	homologue of virK
STM0944	CDS	yljA	putative cytoplasmic protein
STM0948	CDS		putative cytoplasmic protein
STM0953	CDS	infA	protein chain initiation factor IF-1
STM0959	CDS	lrp	regulator for lrp regulon and high-affinity branched-chain amino acid transport system; mediator of of leucine response (AsnC family)
STM0961	CDS	lolA	periplasmic protein effects translocation of lipoproteins from inner membrane to outer membrane
STM0966	CDS	dmsC	anaerobic dimethyl sulfoxide reductase, subunit C
STM0980	CDS	cmk	cytidine monophosphate (CMP) kinase
STM0982	CDS	himD	integration host factor (IHF), beta subunit; site-specific recombination
STM0987	CDS	ycaR	putative inner membrane protein
STM0997	CDS	ycbL	putative Metallo-beta-lactamase
STM0998	CDS	aspC	aspartate aminotransferase
STM1005	CDS		Gifsy-2 prophage; integrase
STM1030	CDS		Gifsy-2 prophage
STM1037	CDS		Gifsy-2 prophage; probable minor tail protein
STM1044	CDS	sodC	Gifsy-2 prophage: superoxide dismutase precursor (Cu-Zn)
STM1048	CDS		Gifsy-2 prophage; host specificity protein J, phage lambda
STM1055	CDS		Gifsy-2 prophage
STM1070	CDS	ompA	putative hydrogenase, membrane component
STM1076	CDS	mgsA	methylglyoxal synthase
STM1079	CDS	yccV	putative inner membrane protein
STM1089	CDS		putative inner membrane protein
STM1090	CDS	pipC	Pathogenicity island encoded protein: homologous to ipgE of Shigella
STM1113	CDS	scsA	Suppression of copper sensitivity: putative copper binding protein
STM1118	CDS	yccJ	putative cytoplasmic protein
STM1119	CDS	wraB	trp-repressor binding protein
STM1121	CDS	ymdF	putative cytoplasmic protein
STM1122	CDS	ycdC	putative transcriptional repressor (TetR/AcrR family)
STM1123	CDS		putative periplasmic protein
STM1146	CDS	ymdA	putative periplasmic protein
STM1152	CDS	yceK	putative outer membrane lipoprotein
STM1153	CDS	msyB	acidic protein suppresses mutants lacking function of protein export
STM1164	CDS	yceB	putative outer membrane lipoprotein
STM1168	CDS	yceH	putative cytoplasmic protein
STM1172	CDS	flgM	anti-FliA (anti-sigma) factor; also known as RflB protein
STM1173	CDS	flgA	flagellar biosynthesis; assembly of basal-body periplasmic P ring
STM1180	CDS	flgH	flagellar biosynthesis, basal-body outer-membrane L (lipopolysaccharide layer) ring protein
STM1190	CDS	yceD	putative metal-binding
STM1191	CDS	rpmF	50S ribosomal subunit protein L32
STM1196	CDS	acpP	acyl carrier protein
STM1202	CDS	ycfH	putative metal-dependent hydrolase
STM1207	CDS	ycfM	putative outer membrane lipoprotein
STM1208	CDS	ycfN	putative cytoplasmic protein
STM1209	CDS	ycfO	putative glycosyl hydrolase
STM1238	CDS	icdA	isocitrate dehydrogenase in e14 prophage, specific for NADP+
STM1239	CDS		putative cytoplasmic protein
STM1244	CDS	pagD	PhoP regulated
STM1249	CDS		putative periplasmic protein
STM1250	CDS		putative cytoplasmic protein
STM1253	CDS		putative inner membrane protein
STM1254	CDS		putative outer membrane lipoprotein
STM1261	CDS		putative cytoplasmic protein
STM1263	CDS		putative periplasmic protein
STM1278	CDS	yeaN	putative MFS family transport protein (amino acid/amine transport)
STM1289	CDS	yeaD	putative enzymes related to aldose 1-epimerase
STM1290	CDS	gapA	glyceraldehyde-3-phosphate dehydrogenase A
STM1291	CDS	yeaA	putative domain frequently associated with peptide methionine sulfoxide reductase
STM1294	CDS	ansA	cytoplasmic L-asparaginase I
STM1296	CDS	ydjA	putative oxidoreductase
STM1300	CDS		putative periplasmic protein
STM1301	CDS		putative mutator MutT protein
STM1329	CDS		putative inner membrane protein
STM1335	CDS	rpmI	50S ribosomal subunit protein L35
STM1336	CDS	rplT	50S ribosomal subunit protein L20
STM1339	CDS	himA	integration host factor (IHF), alpha subunit
STM1343	CDS	nlpC	lipoprotein
STM1344	CDS	ydiV	putative Diguanylate cyclase/phosphodiesterase domain 1
STM1367	CDS	ydiH	putative cytoplasmic protein
STM1369	CDS	sufA	putative HesB-like domain
STM1371	CDS	sufC	putative ABC superfamily (atp_bind) transport protein
STM1374	CDS	ynhA	putative SufE protein probably involved in Fe-S center assembly
STM1377	CDS	lpp	murein lipoprotein, links outer and inner membranes
STM1393	CDS	ssaB	Secretion system apparatus
STM1396	CDS	ssaE	Secretion system effector
STM1397	CDS	sseA	Secretion system effector
STM1398	CDS	sseB	Secretion system effector
STM1399	CDS	sscA	Secretion system chaparone
STM1400	CDS	sseC	Secretion system effector
STM1401	CDS	sseD	Secretion system effector
STM1402	CDS	sseE	Secretion system effector
STM1403	CDS	sscB	Secretion system chaparone
STM1406	CDS	ssaG	Secretion system apparatus
STM1407	CDS	ssaH	Secretion system apparatus
STM1408	CDS	ssaI	Secretion system apparatus
STM1410	CDS		putative cytoplasmic protein
STM1412	CDS	ssaL	Secretion system apparatus
STM1413	CDS	ssaM	Secretion system apparatus
STM1417	CDS	ssaP	Secretion system apparatus
STM1419	CDS	yscR	Secretion system apparatus: homology with YscR of the secretion system of Yersinia
STM1420	CDS	ssaS	Secretion system apparatus: homology with YscS of the secretion system of Yersinia
STM1426	CDS	ribE	riboflavin synthase, alpha chain
STM1427	CDS	cfa	cyclopropane fatty acyl phospholipid synthase
STM1431	CDS	sodB	superoxide dismutase, iron
STM1439	CDS	ydhF	putative aldo/keto reductase
STM1444	CDS	slyA	transcriptional regulator for hemolysin (MarR family)
STM1445	CDS	slyB	putative outer membrane lipoprotein
STM1451	CDS	gst	glutathionine S-transferase
STM1454	CDS	ydgQ	putative NADH-quinone reductase, membrane protein
STM1492	CDS		putative binding-protein-dependent transport system, inner membrane component
STM1493	CDS		putative periplasmic component, ABC transport system
STM1494	CDS		ABC-type transport systems, permease components
STM1502	CDS	speG	spermidine N1-acetyltransferase
STM1503	CDS	ynfB	putative periplasmic protein
STM1513	CDS		putative cytoplasmic protein
STM1514	CDS	ydeJ	putative Competence-damaged protein
STM1515	CDS	ydeI	putative periplasmic protein
STM1530	CDS		putative outer membrane protein
STM1541	CDS		putative regulatory protein, gntR family
STM1546	CDS		putative monooxygenase
STM1548.s	Entrez-CDS	-	putative S-adenosylmethionine/tRNA-ribosyltransferase-isomerase
STM1562	CDS		putative periplasmic transport protein
STM1586	CDS		putative periplasmic protein
STM1594	CDS	srfB	ssrAB activated gene
STM1599	CDS	pdgL	Periplasmic dipeptidase for D-ala-D-ala digestion in peptidoglycan
STM1601	CDS	ugtL	putative membrane protein: homology with chitinase from Schizosaccharomyces
STM1603	CDS	yncJ	putative periplasmic protein
STM1627	CDS		alcohol dehydrogenase class III
STM1629	CDS	STM1629	putative dipicolinate reductase
STM1630	CDS		putative inner membrane protein
STM1652	CDS	ynaF	putative universal stress protein
STM1658	CDS	ydaL	putative Smr domain
STM1660.S	Entrez-CDS	fnr	transcriptional regulator
STM1662	CDS	ynaJ	putative inner membrane protein
STM1665	CDS		putative cytoplasmic protein
STM1679	CDS	mppA	periplasmic murein tripeptide transport protein, also negative regulator of mulitple antibiotic resistance
STM1682	CDS	tpx	thiol peroxidase
STM1686	CDS	pspE	phage shock protein
STM1687	CDS	pspD	phage shock protein
STM1688	CDS	pspC	phage shock protein; regulatory gene, activates expression of psp operon with PspB
STM1689	CDS	pspB	phage shock protein; regulatory gene, activates expression of psp operon with PspC
STM1691	CDS	pspF	transcription activator
STM1705	CDS	osmB	osmotically inducible lipoprotein
STM1716	CDS	sohB	putative peptidase
STM1721	CDS	trpH	trpR controlled transcriptional unit in the 5' upstream region of the trp operon
STM1724	CDS	trpD	anthranilate synthase, component II, bifunctional: glutamine amidotransferase and phosphoribosylanthranilate transferase
STM1725	CDS	trpC	bifunctional: N-(5-phosphoribosyl)anthranilate isomerase; indole-3-glycerolphosphate synthetase
STM1726	CDS	trpB	tryptophan synthase, beta protein
STM1727	CDS	trpA	tryptophan synthase, alpha protein
STM1728	CDS	yciG	putative cytoplasmic protein
STM1729	CDS	yciF	putative cytoplasmic protein
STM1730	CDS	yciE	putative cytoplasmic protein
STM1732	CDS	ompW	outer membrane protein W; colicin S4 receptor; putative transporter
STM1733	CDS		putative ferredoxin
STM1751	CDS	hns	DNA-binding protein HLP-II (HU, BH2, HD, NS); pleiotropic regulator
STM1755	CDS	ychJ	putative cytoplasmic protein
STM1761	CDS	narI	nitrate reductase 1, cytochrome b(NR), gamma subunit
STM1767	CDS	narL	response regulator in two-component regulatory system with NarX (or NarQ), regulates anaerobic respiration and fermentation (LuxR/UhpA familiy)
STM1770	CDS	chaB	cation transport regulator
STM1777	CDS	hemA	glutamyl tRNA reductase
STM1797	CDS	ymgE	putative transglycosylase-associated protein
STM1798	CDS	ycgR	putative inner membrane protein
STM1805	CDS	fadR	negative regulator for fad regulon and positive activator of fabA (GntR family)
STM1809	CDS		putative cytoplasmic protein
STM1810	CDS		putative cytoplasmic protein
STM1811	CDS	ycgN	putative cytoplasmic protein
STM1812	CDS	ycgM	putative Fumarylacetoacetate (FAA) hydrolase family
STM1813	CDS	ycgL	putative cytoplasmic protein
STM1830	CDS	manX	Sugar Specific PTS family, mannose-specific enzyme IIAB
STM1831	CDS	manY	Sugar Specific PTS family, mannose-specific enzyme IIC
STM1833	CDS		putative inner membrane protein
STM1837	CDS	cspC	cold shock protein, multicopy suppresses mukB mutants, putative regulator
STM1838	CDS	yobF	putative cytoplasmic protein
STM1851	CDS		putative cytoplasmic protein
STM1867	CDS	pagK	PhoPQ-activated gene
STM1868A	CDS		putative protein
STM1877	CDS		putative amidohydrolase
STM1881	CDS	yebF	putative periplasmic protein
STM1891	CDS	znuA	ABC superfamily (bind_prot) high affinity Zn transport protein
STM1902	CDS	yecD	putative isochorismatase
STM1905	CDS	yecO	putative SAM-dependent methyltransferases
STM1920	CDS	cheW	purine-binding chemotaxis protein; regulation
STM1927	CDS	yecG	putative universal stress protein
STM1952	CDS	yecS	putative ABC-type amino acid transporter, permease component
STM1954	CDS	fliY	putative periplasmic binding transport protein
STM1959	CDS	fliC	flagellar biosynthesis; flagellin, filament structural protein
STM1961	CDS	fliS	flagellar biosynthesis; repressor of class 3a and 3b operons (RflA activity)
STM1972	CDS	fliI	flagellum-specific ATP synthase
STM1975	CDS	fliL	flagellar biosynthesis
STM1976	CDS	fliM	flagellar biosynthesis, component of motor switch and energizing
STM1977	CDS	fliN	flagellar biosynthesis, component of motor switch and energizing
STM1978	CDS	fliO	flagellar biosynthesis
STM1986	CDS	yedP	putative hydrolase of the HAD superfamily
STM1996	CDS	cspB	putative cold-shock protein
STM2018	CDS	cobU	bifunctional: cobinamide kinase; cobinamide phosphate guanylyltransferase
STM2020	CDS	cbiO	synthesis of vitamin B12 adenosyl cobalamide precursor
STM2038	CDS	pduA	Propanediol utilization: polyhedral bodies
STM2039	CDS	pudB	Propanediol utilization: polyhedral bodies
STM2049	CDS	pduN	Propanediol utilization: polyhedral bodies
STM2059	CDS	yeeX	putative cytoplasmic protein
STM2069	CDS	yeeY	putative transcriptional regulator, LysR family
STM2070	CDS	yeeZ	putative dehydratase
STM2075	CDS	hisH	glutamine amidotransferase, subunit with HisF
STM2080	CDS	udg	UDP-glucose/GDP-mannose dehydrogenase
STM2085	CDS	rfbN	LPS side chain defect: rhamnosyl transferase
STM2087	CDS	rfbV	LPS side chain defect: abequosyltransferase
STM2096	CDS	rfbD	TDP-rhamnose synthetase
STM2098	CDS	galF	putative glucose-1-phosphate uridylyltransferase (UDP-glucose pyrophosphorylase), non-catalytic subunit
STM2131	CDS	baeR	response regulator in two-component regulatory system with BaeS (OmpR family)
STM2138	CDS		putative cytoplasmic protein
STM2139	CDS		putative inner membrane protein
STM2206	CDS	fruF	phosphoenolpyruvate-dependent sugar phosphotransferase system, EIIA 2
STM2213	CDS	yeiU	putative permease
STM2214	CDS	spr	putative lipoprotein, suppresses thermosensitivity of prc mutants at low osmolality
STM2256	CDS	napB	periplasmic nitrate reductase, small subunit, cytochrome C550, in complex with NapA
STM2259	CDS	napA	periplasmic nitrate reductase, large subunit, in complex with NapB
STM2260	CDS	napD	periplasmic nitrate reductase
STM2261	CDS	napF	ferredoxin-type protein: electron transfer
STM2296	CDS	ais	aluminum inducible protein
STM2304	CDS	pmrD	polymyxin resistance protein B
STM2311	CDS	elaB	putative inner membrane protein
STM2312	CDS	elaA	putative acyltransferase
STM2323.S	Entrez-CDS	nuoG	NADH dehydrogenase I chain G
STM2328	CDS	nuoA	NADH dehydrogenase I chain A
STM2335	CDS	yfbU	putative cytoplasmic protein
STM2336	CDS		putative cytoplasmic protein
STM2337	CDS	ackA	acetate kinase A (propionate kinase 2)
STM2354	CDS	hisJ	ABC superfamily (bind_prot), histidine transport protein
STM2355	CDS	argT	ABC superfamily (bind_prot), lysine/arginine/ornithine transport protein
STM2356	CDS	ubiX	3-octaprenyl-4-hydroxybenzoate carboxy-lyase
STM2371	CDS	flk	Couples flagellar P- and L-ring assembly to flagellar morphogenesis; cell division
STM2378	CDS	fabB	3-oxoacyl-[acyl-carrier-protein] synthase I
STM2387	CDS	sixA	phosphohistidine phosphatase
STM2408	CDS	mntH	Nramp family, manganese/divalent cation transport prortein
STM2431	CDS	ptsH	PTS family, Hpr protein, phosphohistidinoprotein-hexose phosphotransferase
STM2433	CDS	crr	PTS family, glucose-specific IIA component
STM2438	CDS	yfeK	putative periplasmic protein
STM2440	CDS	cysM	cysteine synthase B (O-acetylserine sulfhydrolase B)
STM2447	CDS		putative outer membrane lipoprotein
STM2448	CDS	yfeZ	putative inner membrane protein
STM2473	CDS	talA	transaldolase A
STM2491	CDS	bcp	thiol peroxidase, thioredoxin dependent
STM2520	CDS	yfgL	putative serine/threonine protein kinase
STM2523	CDS	gcpE	putative protein, involved in density-dependent regulation of peptidoglycan biosynthesis
STM2542	CDS	nifU	NifU homologs involved in Fe-S cluster formation
STM2566	CDS		putative periplasmic protein
STM2579	CDS	recO	gap repair gene
STM2581	CDS	rnc	RNase III, ds RNA
STM2585	CDS		Gifsy-1 prophage: similar to transpose
STM2638	CDS	rseB	anti sigma E (sigma 24) factor, negative regulator
STM2639	CDS	rseA	anti sigma E (sigma 24) factor, negative regulator
STM2649	CDS	trxC	thioredoxin 2, redox factor
STM2665	CDS	yfiA	ribosome associated factor, stabilizes ribosomes against dissociation
STM2673	CDS	rplS	50S ribosomal subunit protein L19
STM2675	CDS	rimM	16S rRNA processing protein
STM2685	CDS	smpA	small membrane protein A
STM2688	CDS	smpB	small protein B; putative tmRNA-binding protein
STM2743	CDS		putative cytoplasmic protein
STM2747	CDS		putative cytoplasmic protein
STM2761	CDS		putative inner membrane protein
STM2781	CDS	virK	virulence gene; homologous sequence to virK in Shigella
STM2794	CDS	ygaE	putative transcriptional repressor (GntR familiy)
STM2795	CDS	ygaU	putative LysM domain
STM2796	CDS	yqaE	putative YqaE family transport protein
STM2797	CDS		putative regulatory protein, arsR family
STM2826	CDS	csrA	carbon storage regulator
STM2841	CDS	ygbD	putative oxidoreductase
STM2860	CDS	ygbA	putative cytoplasmic protein
STM2870	CDS		putative inner membrane protein
STM2872	CDS	prgJ	cell invasion protein; cytoplasmic
STM2873	CDS	prgI	cell invasion protein; cytoplasmic
STM2877	CDS	iagB	cell invasion protein
STM2879	CDS	sicP	chaparone, related to virulence
STM2881	CDS	iacP	putative acyl carrier protein
STM2888	CDS	spaR	surface presentation of antigens; secretory proteins
STM2889	CDS	spaQ	surface presentation of antigens; secretory proteins
STM2890	CDS	spaP	surface presentation of antigens; secretory proteins
STM2893	CDS	invI	surface presentation of antigens; secretory proteins
STM2895	CDS	invB	surface presentation of antigens; secretory proteins
STM2900	CDS	invH	invasion protein
STM2922	CDS		putative 3-polyprenyl-4-hydroxybenzoate decarboxylase and related decarboxylase
STM2923	CDS		putative cytoplasmic protein
STM2954	CDS	mazG	putative pyrophosphatase
STM2965	CDS	yqcC	putative cytoplasmic protein
STM3029.S	Entrez-CDS	stdA	putative fimbrial-like protein
STM3030	CDS		putative periplasmic protein
STM3033	CDS		putative nucleic acid-binding protein, contains PIN domain
STM3034	CDS		putative cytoplasmic protein
STM3049	CDS	yqfA	putative hemolysin
STM3051	CDS	bglA	6-phospho-beta-glucosidase A
STM3052	CDS		putative outer membrane protein
STM3060	CDS	ygfE	putative cytoplasmic protein
STM3089	CDS	yqgD	putative inner membrane protein
STM3107	CDS	yggN	putative periplasmic protein
STM3108	CDS	yggL	putative cytoplasmic protein
STM3154	CDS		putative ATP-dependent RNA helicase-like protein
STM3155	CDS		putative cytoplasmic protein
STM3156	CDS		putative cytoplasmic protein
STM3159	CDS	exbB	uptake of enterochelin; tonB-dependent uptake of B colicins
STM3195	CDS	ribB	3,4 dihydroxy-2-butanone-4-phosphate synthase
STM3197	CDS	glgS	glycogen biosynthesis, rpoS dependent
STM3227	CDS	yqjB	putative outer membrane protein
STM3228	CDS	yqjC	putative periplasmic protein
STM3229	CDS	yqjD	putative inner membrane protein
STM3230	CDS	yqjE	putative inner membrane protein
STM3231	CDS	yqjK	putative inner membrane protein
STM3265	CDS	yraN	putative endonuclease
STM3266	CDS	yraO	putative phosphoheptose isomerase
STM3270	CDS	yhbP	putative cytoplasmic protein
STM3273	CDS	yhbT	putative lipid carrier protein
STM3288	CDS	yhbC	putative cytoplasmic protein
STM3299	CDS	greA	transcription elongation factor, cleaves 3' nucleotide of paused mRNA
STM3303	CDS	rpmA	50S ribosomal subunit protein L27
STM3321	CDS	yhbH	putative sigma N modulation factor
STM3325	CDS	yrbL	putative cytoplasmic protein
STM3337	CDS	nanE	putative ManNAc-6P epimerase
STM3345	CDS	rplM	50S ribosomal subunit protein L13
STM3361	CDS	yhcN	putative outer membrane protein
STM3363	CDS	yhcO	putative cytoplasmic protein
STM3370	CDS	cafA	RNase G
STM3374.1n	Entrez-CDS	-	hypothetical protein
STM3374.1n	Entrez-CDS	rpsN	30S ribosomal subunit protein S14
STM3402	CDS	yrdC	putative translation factor
STM3406	CDS	def	peptide deformylase
STM3410	CDS	mscL	mechanosensitive channel
STM3411	CDS		putative cytoplasmic protein
STM3414	CDS	rplQ	50S ribosomal subunit protein L17
STM3415	CDS	rpoA	RNA polymerase, alpha subunit
STM3418	CDS	rpsM	30S ribosomal subunit protein S13
STM3419	CDS	rpmJ	50S ribosomal subunit protein X
STM3421	CDS	rplO	50S ribosomal subunit protein L15
STM3422	CDS	rpmD	50S ribosomal subunit protein L30
STM3423	CDS	rpsE	30S ribosomal subunit protein S5
STM3424	CDS	rplR	50S ribosomal subunit protein L18
STM3425	CDS	rplF	50S ribosomal subunit protein L6
STM3426	CDS	rpsH	30S ribosomal subunit protein S8, and regulator
STM3427.S	Entrez-CDS	rpsN	30S ribosomal subunit protein S14
STM3428	CDS	rplE	50S ribosomal subunit protein L5
STM3430	CDS	rplN	50S ribosomal subunit protein L14
STM3431	CDS	rpsQ	30S ribosomal subunit protein S17
STM3432	CDS	rpmC	50S ribosomal subunit protein L29
STM3433	CDS	rplP	50S ribosomal subunit protein L16
STM3436	CDS	rpsS	30S ribosomal subunit protein S19
STM3438	CDS	rplW	50S ribosomal subunit protein L23
STM3443	CDS	bfr	bacterioferrin, an iron storage homoprotein
STM3445	CDS	tufA	protein chain elongation factor EF-Tu (duplicate of tufB)
STM3447	CDS	rpsG	30S ribosomal subunit protein S7, initiates assembly
STM3448	CDS	rpsL	30S ribosomal subunit protein S12
STM3449	CDS	yheL	putative oxidation of intracellular sulfur
STM3451	CDS	yheN	putative ACR involved in intracellular sulfur reduction
STM3453	CDS	fkpA	FKBP-type peptidyl-prolyl cis-trans isomerase (rotamase)
STM3456	CDS	yheV	putative cytoplasmic protein
STM3461	CDS		putative cytoplasmic protein
STM3485	CDS	damX	membrane protein
STM3487	CDS	aroK	shikimate kinase I
STM3505	CDS	feoA	ferrous iron transport protein A
STM3552	CDS	yhhA	putative outer membrane protein
STM3578	CDS	yhhP	small ubiquitous protein required for normal growth
STM3580	CDS		putative inner membrane lipoprotein
STM3591	CDS	uspA	universal stress protein A
STM3598	CDS		putative L-asparaginase
STM3614	CDS	dctA	DAACS family, C4-dicarboxylic acids transport protein
STM3628	CDS	dppC	ABC superfamily (membrane), dipeptide transport protein 2
STM3633	CDS		putative bacterial regulatory proteins, lacI family
STM3636	CDS	lpfE	long polar fimbrial minor protein
STM3647	CDS	yiaF	putative outer membrane lipoprotein
STM3649	CDS	cspA	major cold shock protein 7.4, transcriptional activator of hns
STM3684	CDS	yibF	putative glutathione S-transferase
STM3702	CDS	grxC	glutaredoxin 3
STM3703	CDS	yibN	putative Rhodanese-related sulfurtransferases
STM3711	CDS	rfaF	ADP-heptose; LPS heptosyltransferase 1
STM3741	CDS	rpoZ	RNA polymerase, omega subunit
STM3797	CDS	ivbL	ilvB operon leader peptide
STM3809.S	Entrez-CDS	ibpA	small heat shock protein
STM3839	CDS	rpmH	50S ribosomal subunit protein L34
STM3869	CDS	atpF	membrane-bound ATP synthase, F0 sector, subunit b
STM3871	CDS	atpB	membrane-bound ATP synthase, F0 sector, subunit a, important for FO assembly
STM3902	CDS	ilvM	acetolactate synthase II, small subunit
STM3915	CDS	trxA	thioredoxin 1, redox factor
STM3965	CDS	metE	5-methyltetrahydropteroyltriglutamate-homocysteine S-methyltransferase
STM3997	CDS	dsbA	periplasmic protein disulfide isomerase I
STM4009	CDS	typA	GTP-binding elongation factor family protein
STM4045	CDS	rhaD	rhamnulose-1-phosphate aldolase
STM4055	CDS	sodA	superoxide dismutase, manganese
STM4060	CDS	cpxP	periplasmic repressor of cpx regulon by interaction with CpxA, rescue from transitory stresses
STM4088	CDS	yiiU	putative cytoplasmic protein
STM4092	CDS	hslV	peptidase component of the HslUV protease
STM4105	CDS	metF	5,10-methylenetetrahydrofolate reductase
STM4141	CDS		putative cytoplasmic protein
STM4147	CDS	secE	preprotein translocase IISP family, membrane subunit
STM4150	CDS	rplA	50S ribosomal subunit protein L1, regulates synthesis of L1 and L11
STM4152	CDS	rplL	50S ribosomal subunit protein L7/L12
STM4160	CDS	thiG	deoxyxylulose-5-P + thi-S-COSH + tyrosine = 4-methyl-5-(beta-hydroxyethyl)thiazole-P + 4-hydroxy-benzyl-alcohol + C1 of tyrosine
STM4161	CDS		putative involved in thiamine biosynthesis
STM4163	CDS	thiE	thiamin phosphate synthase (thiamine phosphate pyrophosphorylase)
STM4164	CDS	thiC	5'-phosphoryl-5-aminoimidazole = 4-amino-5-hydroxymethyl-2-methylpyrimidine-P
STM4170	CDS	hupA	DNA-binding protein HU-alpha (HU-2)
STM4233	CDS	ubiC	chorismate pyruvate lyase
STM4239	CDS		putative cytoplasmic protein
STM4240	CDS	yjbJ	putative cytoplasmic protein
STM4250	CDS	yjbQ	putative cytoplasmic protein
STM4251	CDS	yjbR	putative cytoplasmic protein
STM4257	CDS		putative inner membrane or exported
STM4258	CDS		putative methyl-accepting chemotaxis protein
STM4260	CDS		membrane permease, predicted cation efflux pump
STM4262	CDS		putative ABC-type bacteriocin/lantibiotic exporter, contain an N-terminal double-glycine peptidase domain
STM4311	CDS	tnpA_1	IS200 transposase
STM4320	CDS		putative bacterial regulatory protein, merR family
STM4329	CDS	mopB	chaperone Hsp10, affects cell division
STM4346	CDS	yjeO	putative inner membrane protein
STM4361	CDS	hfq	host factor I for bacteriophage Q beta replication, a growth-related protein
STM4367	CDS	yjeB	putative negative regulator
STM4378	CDS	yjfN	putative inner membrane protein
STM4391	CDS	rpsF	30S ribosomal subunit protein S6
STM4393	CDS	rpsR	30S ribosomal subunit protein S18
STM4414	CDS	ppa	inorganic pyrophosphatase
STM4468	CDS	yjgK	putative cytoplasmic protein
STM4512	CDS	iadA	isoaspartyl dipeptidase
STM4514.S	Entrez-CDS	yjiH	putative inner membrane protein
STM4521	CDS	yjiS	putative cytoplasmic protein
STM4522	CDS		putative inner membrane protein
STM4552	CDS		putative inner membrane protein
STM4561	CDS	osmY	hyperosmotically inducible periplasmic protein, RpoS-dependent stationary phase gene
STM4562	CDS		putative inner membrane protein

## Sheet: 2. AMM-1_Hfq
Name	STM Gene type	STM Gene symbol	STM Function	Log2 (Fold change value)
STM1837	CDS	cspC	cold shock protein, multicopy suppresses mukB mutants, putative regulator	-3.78643
STM1339	CDS	himA	integration host factor (IHF), alpha subunit	-3.65546
STM3419	CDS	rpmJ	50S ribosomal subunit protein X	-3.30728
STM1408	CDS	ssaI	Secretion system apparatus	-3.29315
STM3060	CDS	ygfE	putative cytoplasmic protein	-3.02886
STM3649	CDS	cspA	major cold shock protein 7.4, transcriptional activator of hns	-2.98347
STM3505	CDS	feoA	ferrous iron transport protein A	-2.97198
STM1601	CDS	ugtL	putative membrane protein: homology with chitinase from Schizosaccharomyces	-2.96887
STM3418	CDS	rpsM	30S ribosomal subunit protein S13	-2.95427
STM1406	CDS	ssaG	Secretion system apparatus	-2.94598
STM_sRNA_CsrB	RNA	csrB	regulatory RNA	-2.83675
STM4361	CDS	hfq	host factor I for bacteriophage Q beta replication, a growth-related protein	-2.82952
STM0853	CDS	yliH	putative cytoplasmic protein	-2.70466
STM3438	CDS	rplW	50S ribosomal subunit protein L23	-2.64579
STM1377	CDS	lpp	murein lipoprotein, links outer and inner membranes	-2.62724
STM0944	CDS	yljA	putative cytoplasmic protein	-2.55828
STM3427.S	Entrez-CDS	rpsN	30S ribosomal subunit protein S14	-2.53256
STM3702	CDS	grxC	glutaredoxin 3	-2.53033
STM1603	CDS	yncJ	putative periplasmic protein	-2.49167
STM2665	CDS	yfiA	ribosome associated factor, stabilizes ribosomes against dissociation	-2.43437
STM1336	CDS	rplT	50S ribosomal subunit protein L20	-2.38266
STM1396	CDS	ssaE	Secretion system effector	-2.36175
STM0082	CDS		putative secreted protein	-2.35922
STM1249	CDS		putative periplasmic protein	-2.3171
STM1191	CDS	rpmF	50S ribosomal subunit protein L32	-2.31224
STM1335	CDS	rpmI	50S ribosomal subunit protein L35	-2.30679
CHIP7_STM2693	RNA	10Sa	regulatory RNA	-2.25097
STM_sRNA_Alpha_RBS				-2.21646
STM3443	CDS	bfr	bacterioferrin, an iron storage homoprotein	-2.2148
STM4170	CDS	hupA	DNA-binding protein HU-alpha (HU-2)	-2.17488
STM3034	CDS		putative cytoplasmic protein	-2.15549
STM1451	CDS	gst	glutathionine S-transferase	-2.14386
STM2059	CDS	yeeX	putative cytoplasmic protein	-2.13353
STM3227	CDS	yqjB	putative outer membrane protein	-2.13101
STM0225	CDS	hlpA	histone-like protein, located in outer membrane	-2.12404
STM3424	CDS	rplR	50S ribosomal subunit protein L18	-2.11238
STM1407	CDS	ssaH	Secretion system apparatus	-2.05834
STM3448	CDS	rpsL	30S ribosomal subunit protein S12	-2.05651
CHIP7_STM3916	pseudogene	rhoL	pseudogene; no in-frame start	-2.0495
STM2296	CDS	ais	aluminum inducible protein	-2.01742
STM0227	CDS	fabZ	(3R)-hydroxymyristol acyl carrier protein dehydratase	-2.00358
STM3591	CDS	uspA	universal stress protein A	-1.98958
STM1927	CDS	yecG	putative universal stress protein	-1.96376
STM3436	CDS	rpsS	30S ribosomal subunit protein S19	-1.91598
STM_sRNA_rne5	pseudogene		pseudogene; in-frame stop following codon 97; no start near coli start	-1.91488
STM1652	CDS	ynaF	putative universal stress protein	-1.91474
STM1586	CDS		putative periplasmic protein	-1.88915
STM0119	CDS	yabB	putative cytoplasmic protein	-1.88547
STM0833	CDS	ompX	outer membrane protease, receptor for phage OX2	-1.87945
STM3432	CDS	rpmC	50S ribosomal subunit protein L29	-1.86921
STM3423	CDS	rpsE	30S ribosomal subunit protein S5	-1.86661
STM3345	CDS	rplM	50S ribosomal subunit protein L13	-1.86599
STM1420	CDS	ssaS	Secretion system apparatus: homology with YscS of the secretion system of Yersinia	-1.85911
STM1954	CDS	fliY	putative periplasmic binding transport protein	-1.85187
STM4092	CDS	hslV	peptidase component of the HslUV protease	-1.83129
STM0797	CDS	bioD	dethiobiotin synthetase	-1.83082
STM3915	CDS	trxA	thioredoxin 1, redox factor	-1.82521
STM1244	CDS	pagD	PhoP regulated	-1.82475
STM3839	CDS	rpmH	50S ribosomal subunit protein L34	-1.81726
STM1164	CDS	yceB	putative outer membrane lipoprotein	-1.81114
STM2335	CDS	yfbU	putative cytoplasmic protein	-1.81064
STM0831	CDS	dps	stress response DNA-binding protein; starvation induced resistance to H2O2	-1.81016
STM4391	CDS	rpsF	30S ribosomal subunit protein S6	-1.79549
STM2070	CDS	yeeZ	putative dehydratase	-1.79523
STM2685	CDS	smpA	small membrane protein A	-1.79449
STM3422	CDS	rpmD	50S ribosomal subunit protein L30	-1.79209
STM1805	CDS	fadR	negative regulator for fad regulon and positive activator of fabA (GntR family)	-1.79035
STM1867	CDS	pagK	PhoPQ-activated gene	-1.78874
STM0465	CDS	ybaY	glycoprotein/polysaccharide metabolism	-1.77738
STM2673	CDS	rplS	50S ribosomal subunit protein L19	-1.76395
STM2431	CDS	ptsH	PTS family, Hpr protein, phosphohistidinoprotein-hexose phosphotransferase	-1.75403
STM3430	CDS	rplN	50S ribosomal subunit protein L14	-1.74389
STM_sRNA_RFN				-1.74319
STM3229	CDS	yqjD	putative inner membrane protein	-1.74072
STM_sRNA_THI				-1.73767
STM0997	CDS	ycbL	putative Metallo-beta-lactamase	-1.73446
STM3288	CDS	yhbC	putative cytoplasmic protein	-1.72336
STM3230	CDS	yqjE	putative inner membrane protein	-1.72089
STM4367	CDS	yjeB	putative negative regulator	-1.70007
STM0485	CDS	ybaB	putative cytoplasmic protein	-1.69927
STM2138	CDS		putative cytoplasmic protein	-1.69687
STM2860	CDS	ygbA	putative cytoplasmic protein	-1.68616
STM2826	CDS	csrA	carbon storage regulator	-1.66111
STM1413	CDS	ssaM	Secretion system apparatus	-1.64577
STM4414	CDS	ppa	inorganic pyrophosphatase	-1.63799
STM3266	CDS	yraO	putative phosphoheptose isomerase	-1.62592
STM0089	CDS	apaG	putative cytoplasmic protein	-1.61885
STM2440	CDS	cysM	cysteine synthase B (O-acetylserine sulfhydrolase B)	-1.60758
STM1770	CDS	chaB	cation transport regulator	-1.60555
STM3703	CDS	yibN	putative Rhodanese-related sulfurtransferases	-1.58834
STM3303	CDS	rpmA	50S ribosomal subunit protein L27	-1.57375
STM0417	CDS	ribH	riboflavin synthase, beta chain	-1.56773
STM3485	CDS	damX	membrane protein	-1.54116
STM1830	CDS	manX	Sugar Specific PTS family, mannose-specific enzyme IIAB	-1.53625
STM1996	CDS	cspB	putative cold-shock protein	-1.52498
STM3049	CDS	yqfA	putative hemolysin	-1.52018
STM2378	CDS	fabB	3-oxoacyl-[acyl-carrier-protein] synthase I	-1.50797
STM1371	CDS	sufC	putative ABC superfamily (atp_bind) transport protein	-1.50748
STM0697	CDS	seqA	negative modulator of initiation of replication, inhibits open complex formation, mutation in gene alters cell membrane	-1.50053
STM2433	CDS	crr	PTS family, glucose-specific IIA component	-1.49879
STM0708	CDS	ybfA	putative periplasmic protein	-1.4986
STM1393	CDS	ssaB	Secretion system apparatus	-1.49477
STM3869	CDS	atpF	membrane-bound ATP synthase, F0 sector, subunit b	-1.49366
STM0998	CDS	aspC	aspartate aminotransferase	-1.49167
STM1196	CDS	acpP	acyl carrier protein	-1.49152
STM4105	CDS	metF	5,10-methylenetetrahydrofolate reductase	-1.48282
STM2075	CDS	hisH	glutamine amidotransferase, subunit with HisF	-1.47496
STM3552	CDS	yhhA	putative outer membrane protein	-1.45916
STM0807	CDS	ybhL	putative permease	-1.45113
STM1454	CDS	ydgQ	putative NADH-quinone reductase, membrane protein	-1.45083
STM0708	CDS	ybfA	putative periplasmic protein	-1.45005
STM3228	CDS	yqjC	putative periplasmic protein	-1.4438
STM0959	CDS	lrp	regulator for lrp regulon and high-affinity branched-chain amino acid transport system; mediator of of leucine response (AsnC family)	-1.44151
STM1445	CDS	slyB	putative outer membrane lipoprotein	-1.43351
STM4163	CDS	thiE	thiamin phosphate synthase (thiamine phosphate pyrophosphorylase)	-1.43265
STM1503	CDS	ynfB	putative periplasmic protein	-1.39924
STM4250	CDS	yjbQ	putative cytoplasmic protein	-1.39664
STM0616	CDS	rnk	regulator of nucleoside diphosphate kinase	-1.39042
STM4160	CDS	thiG	deoxyxylulose-5-P + thi-S-COSH + tyrosine = 4-methyl-5-(beta-hydroxyethyl)thiazole-P + 4-hydroxy-benzyl-alcohol + C1 of tyrosine	-1.38504
STM1369	CDS	sufA	putative HesB-like domain	-1.38495
STM0980	CDS	cmk	cytidine monophosphate (CMP) kinase	-1.38309
STM0186	CDS	dksA	dnaK suppressor protein	-1.3825
STM3195	CDS	ribB	3,4 dihydroxy-2-butanone-4-phosphate synthase	-1.37744
STM0216	CDS	rpsB	30S ribosomal subunit protein S2	-1.35957
STM3363	CDS	yhcO	putative cytoplasmic protein	-1.3518
STM4161	CDS		putative involved in thiamine biosynthesis	-1.34864
STM1291	CDS	yeaA	putative domain frequently associated with peptide methionine sulfoxide reductase	-1.34614
STM2675	CDS	rimM	16S rRNA processing protein	-1.33466
STM2473	CDS	talA	transaldolase A	-1.33011
STM2520	CDS	yfgL	putative serine/threonine protein kinase	-1.32397
STM0961	CDS	lolA	periplasmic protein effects translocation of lipoproteins from inner membrane to outer membrane	-1.32257
STM3741	CDS	rpoZ	RNA polymerase, omega subunit	-1.31124
STM3321	CDS	yhbH	putative sigma N modulation factor	-1.30727
STM1630	CDS		putative inner membrane protein	-1.30536
STM2096	CDS	rfbD	TDP-rhamnose synthetase	-1.30516
STM3231	CDS	yqjK	putative inner membrane protein	-1.30241
STM3997	CDS	dsbA	periplasmic protein disulfide isomerase I	-1.297
STM4378	CDS	yjfN	putative inner membrane protein	-1.29685
STM1502	CDS	speG	spermidine N1-acetyltransferase	-1.29377
STM4240	CDS	yjbJ	putative cytoplasmic protein	-1.27689
STM0744	CDS	ybgC	putative esterase	-1.26674
STM4088	CDS	yiiU	putative cytoplasmic protein	-1.2588
STM2139	CDS		putative inner membrane protein	-1.25127
STM4346	CDS	yjeO	putative inner membrane protein	-1.24801
STM1751	CDS	hns	DNA-binding protein HLP-II (HU, BH2, HD, NS); pleiotropic regulator	-1.24307
STM2688	CDS	smpB	small protein B; putative tmRNA-binding protein	-1.23694
STM2795	CDS	ygaU	putative LysM domain	-1.23418
STM4147	CDS	secE	preprotein translocase IISP family, membrane subunit	-1.2323
STM1250	CDS		putative cytoplasmic protein	-1.23062
STM3033	CDS		putative nucleic acid-binding protein, contains PIN domain	-1.22829
STM0440	CDS	cyoD	cytochrome o ubiquinol oxidase subunit IV	-1.22804
STM0636	CDS	ybeD	putative cytoplasmic protein	-1.22787
STM1716	CDS	sohB	putative peptidase	-1.21589
STM3809.S	Entrez-CDS	ibpA	small heat shock protein	-1.21357
STM3414	CDS	rplQ	50S ribosomal subunit protein L17	-1.2102
STM3299	CDS	greA	transcription elongation factor, cleaves 3' nucleotide of paused mRNA	-1.2061
STM1168	CDS	yceH	putative cytoplasmic protein	-1.18319
STM0423	CDS	ispA	geranyltranstransferase (farnesyldiphosphate synthase)	-1.17512
STM0823	CDS	ybiJ	putative periplasmic protein	-1.17361
STM1838	CDS	yobF	putative cytoplasmic protein	-1.16889
STM3580	CDS		putative inner membrane lipoprotein	-1.16756
STM0628	CDS	pagP	PhoPQ-activated gene	-1.16552
STM1207	CDS	ycfM	putative outer membrane lipoprotein	-1.14912
STM3426	CDS	rpsH	30S ribosomal subunit protein S8, and regulator	-1.1418
STM2542	CDS	nifU	NifU homologs involved in Fe-S cluster formation	-1.14095
STM1541	CDS		putative regulatory protein, gntR family	-1.13481
STM0746	CDS	tolR	tol protein, role in outer membrane integrity, uptake of group A colicins (TonB independent), and translocation of phage DNA to cytoplasm	-1.13138
STM4393	CDS	rpsR	30S ribosomal subunit protein S18	-1.11756
STM2098	CDS	galF	putative glucose-1-phosphate uridylyltransferase (UDP-glucose pyrophosphorylase), non-catalytic subunit	-1.11487
STM1089	CDS		putative inner membrane protein	-1.11422
STM1905	CDS	yecO	putative SAM-dependent methyltransferases	-1.10532
STM3107	CDS	yggN	putative periplasmic protein	-1.10465
STM3431	CDS	rpsQ	30S ribosomal subunit protein S17	-1.1016
STM1055	CDS		Gifsy-2 prophage	-1.09936
STM2579	CDS	recO	gap repair gene	-1.0935
STM3684	CDS	yibF	putative glutathione S-transferase	-1.08274
STM1831	CDS	manY	Sugar Specific PTS family, mannose-specific enzyme IIC	-1.07631
STM4251	CDS	yjbR	putative cytoplasmic protein	-1.07135
STM3487	CDS	aroK	shikimate kinase I	-1.0603
STM4150	CDS	rplA	50S ribosomal subunit protein L1, regulates synthesis of L1 and L11	-1.04218
STM2131	CDS	baeR	response regulator in two-component regulatory system with BaeS (OmpR family)	-1.03956
STM3449	CDS	yheL	putative oxidation of intracellular sulfur	-1.034
STM3902	CDS	ilvM	acetolactate synthase II, small subunit	-1.02967
STM2354	CDS	hisJ	ABC superfamily (bind_prot), histidine transport protein	-1.02734
STM0987	CDS	ycaR	putative inner membrane protein	-1.0207
STM0814	CDS	ybhQ	putative inner membrane protein	-1.01884
STM0307	CDS		homology to Shigella VirG protein	-1.00896
STM1627	CDS		alcohol dehydrogenase class III	-1.00817
STM1426	CDS	ribE	riboflavin synthase, alpha chain	-1.00488
STM1679	CDS	mppA	periplasmic murein tripeptide transport protein, also negative regulator of mulitple antibiotic resistance	-1.00069
STM3273	CDS	yhbT	putative lipid carrier protein	-0.998734
STM4164	CDS	thiC	5'-phosphoryl-5-aminoimidazole = 4-amino-5-hydroxymethyl-2-methylpyrimidine-P	1.00573
STM_PSLT091	CDS	traW	conjugative transfer: assembly	1.02726
STM1417	CDS	ssaP	Secretion system apparatus	1.03028
STM1410	CDS		putative cytoplasmic protein	1.03942
STM2743	CDS		putative cytoplasmic protein	1.04144
STM2781	CDS	virK	virulence gene; homologous sequence to virK in Shigella	1.04978
STM4164	CDS	thiC	5'-phosphoryl-5-aminoimidazole = 4-amino-5-hydroxymethyl-2-methylpyrimidine-P	1.08324
STM2639	CDS	rseA	anti sigma E (sigma 24) factor, negative regulator	1.12775
STM0346	CDS		putative outer membrane protein; homologue of ail and ompX	1.13119
STM2841	CDS	ygbD	putative oxidoreductase	1.1358
STM3871	CDS	atpB	membrane-bound ATP synthase, F0 sector, subunit a, important for FO assembly	1.17091
STM3051	CDS	bglA	6-phospho-beta-glucosidase A	1.21355
STM1403	CDS	sscB	Secretion system chaparone	1.22914
STM0940	CDS	ybjX	homologue of virK	1.22969
STM3445	CDS	tufA	protein chain elongation factor EF-Tu (duplicate of tufB)	1.25539
STM1412	CDS	ssaL	Secretion system apparatus	1.26128
STM4320	CDS		putative bacterial regulatory protein, merR family	1.26177
STM_PSLT089	CDS	trbI	conjugative transfer	1.27361
STM0617	CDS	rna	RNase I, cleaves phosphodiester bond between any two nucleotides	1.32813
STM3370	CDS	cafA	RNase G	1.37156
STM3453	CDS	fkpA	FKBP-type peptidyl-prolyl cis-trans isomerase (rotamase)	1.41769
STM1548.s	Entrez-CDS	-	putative S-adenosylmethionine/tRNA-ribosyltransferase-isomerase	1.47203
STM_PSLT046	CDS		putative carbonic anhydrase	1.51503
STM_PSLT015	CDS	orf5	putative outer membrane protein	1.63391
STM1044	CDS	sodC	Gifsy-2 prophage: superoxide dismutase precursor (Cu-Zn)	1.74543
STM1397	CDS	sseA	Secretion system effector	1.95179
STM1401	CDS	sseD	Secretion system effector	2.05867
STM1400	CDS	sseC	Secretion system effector	3.54859

## Sheet: 3. AMM-2_Hfq
Name	STM Gene type	STM Gene symbol	STM Function	Log2 (Fold change value)
CHIP7_STM1120	pseudogene	ycdF	pseudogene; in-frame stops following codons 5 and 21	-6.94874
STM1113	CDS	ymdF	putative cytoplasmic protein	-6.26541
STM1249	CDS		putative cytoplasmic protein	-5.44612
STM1730	CDS		putative cytoplasmic protein	-3.98728
STM2355	CDS	ygfE	putative cytoplasmic protein	-3.44146
STM0998	CDS	yccJ	putative cytoplasmic protein	-3.20925
STM_sRNA_Cobalamin A	RNA	csrB	regulatory RNA	-3.15238
STM1005	CDS	wraB	trp-repressor binding protein	-2.82865
STM1153	CDS	rpmI	50S ribosomal subunit protein L35	-2.77888
STM1209	CDS	lpp	murein lipoprotein, links outer and inner membranes	-2.75735
STM1805	CDS	pduA	Propanediol utilization: polyhedral bodies	-2.68858
STM0216	CDS	ybaY	glycoprotein/polysaccharide metabolism	-2.61872
STM3108	CDS	mopB	chaperone Hsp10, affects cell division	-2.53942
STM3197	CDS	hfq	host factor I for bacteriophage Q beta replication, a growth-related protein	-2.52998
STM1377	CDS	trpB	tryptophan synthase, beta protein	-2.52551
STM1208	CDS	rplT	50S ribosomal subunit protein L20	-2.34916
STM0089	CDS	psiF	induced by phosphate starvation	-2.22845
STM_sRNA_rne5	CDS		putative cytoplasmic protein	-2.06905
STM1427	CDS	yciG	putative cytoplasmic protein	-1.99177
STM1724	CDS		putative cytoplasmic protein	-1.98066
STM1728	CDS	cspC	cold shock protein, multicopy suppresses mukB mutants, putative regulator	-1.97909
STM1121	CDS	msyB	acidic protein suppresses mutants lacking function of protein export	-1.92967
STM_sRNA_CsrB	pseudogene		pseudogene; in-frame stop following codon 97; no start near coli start	-1.89684
STM3411				-1.79063
STM1336	CDS	trpD	anthranilate synthase, component II, bifunctional: glutamine amidotransferase and phosphoribosylanthranilate transferase	-1.71037
STM2638	CDS	yrbL	putative cytoplasmic protein	-1.69877
STM1244	CDS	cfa	cyclopropane fatty acyl phospholipid synthase	-1.68859
STM1335	CDS	ynaJ	putative inner membrane protein	-1.68343
STM0384	CDS	ybaZ	putative methyltransferase	-1.6776
STM2039	CDS		putative periplasmic protein	-1.63666
STM0465	CDS	cspE	RNA chaperone, negative regulator of cspA transcription	-1.6291
STM1755	CDS	fliC	flagellar biosynthesis; flagellin, filament structural protein	-1.59569
STM0807	CDS		putative cytoplasmic protein	-1.57309
STM2323.S	CDS	ygaU	putative LysM domain	-1.53987
STM2675	CDS	ivbL	ilvB operon leader peptide	-1.51639
STM1809	CDS	pduN	Propanediol utilization: polyhedral bodies	-1.50922
STM0982	CDS	scsA	Suppression of copper sensitivity: putative copper binding protein	-1.50653
STM3229	CDS	osmY	hyperosmotically inducible periplasmic protein, RpoS-dependent stationary phase gene	-1.49574
STM2020	CDS	fabB	3-oxoacyl-[acyl-carrier-protein] synthase I	-1.47864
STM_sRNA_SraH	CDS	dnaJ	heat shock protein, DnaJ and GrpE stimulates ATPase activity of DnaK	-1.47703
STM0119	CDS	cyoD	cytochrome o ubiquinol oxidase subunit IV	-1.47478
STM0854	CDS	infA	protein chain initiation factor IF-1	-1.43702
STM0440	CDS	ybaB	putative cytoplasmic protein	-1.43496
STM1726	CDS	ycgN	putative cytoplasmic protein	-1.43271
STM0732	CDS	dps	stress response DNA-binding protein; starvation induced resistance to H2O2	-1.42434
STM0814	CDS	yljA	putative cytoplasmic protein	-1.41889
STM1660.S	CDS	chaB	cation transport regulator	-1.4079
STM1811	CDS	spr	putative lipoprotein, suppresses thermosensitivity of prc mutants at low osmolality	-1.38405
STM0485	CDS	ybhL	putative permease	-1.37728
STM1688	CDS	fadR	negative regulator for fad regulon and positive activator of fabA (GntR family)	-1.36299
STM2328	CDS		putative cytoplasmic protein	-1.36246
STM0629	CDS	ybhQ	putative inner membrane protein	-1.32966
STM1851	CDS	nuoA	NADH dehydrogenase I chain A	-1.30036
STM1662	CDS	hemA	glutamyl tRNA reductase	-1.29728
STM1122	CDS	ycfN	putative cytoplasmic protein	-1.2929
STM0948	CDS	himD	integration host factor (IHF), beta subunit; site-specific recombination	-1.28053
STM1254	CDS	ydeJ	putative Competence-damaged protein	-1.2793
STM0953	CDS	aspC	aspartate aminotransferase	-1.26647
STM1562	CDS	ychJ	putative cytoplasmic protein	-1.2578
STM1959	CDS	argT	ABC superfamily (bind_prot), lysine/arginine/ornithine transport protein	-1.25035
STM0944	CDS	lrp	regulator for lrp regulon and high-affinity branched-chain amino acid transport system; mediator of of leucine response (AsnC family)	-1.24662
STM1119	CDS	yceK	putative outer membrane lipoprotein	-1.24368
STM2491	CDS	yqjD	putative inner membrane protein	-1.23115
STM0831	CDS		putative cytoplasmic protein	-1.22761
STM2566	CDS	yhbC	putative cytoplasmic protein	-1.2173
STM1770	CDS	cobU	bifunctional: cobinamide kinase; cobinamide phosphate guanylyltransferase	-1.20989
STM0081	CDS	yabB	putative cytoplasmic protein	-1.20217
STM1732	CDS	yebF	putative periplasmic protein	-1.1858
STM1514	CDS	ompW	outer membrane protein W; colicin S4 receptor; putative transporter	-1.16785
STM2038	CDS	bcp	thiol peroxidase, thioredoxin dependent	-1.14869
STM2371	CDS	yggL	putative cytoplasmic protein	-1.14295
STM1513	CDS	yciE	putative cytoplasmic protein	-1.14022
STM2354	CDS	mazG	putative pyrophosphatase	-1.13818
STM2954	CDS	hupA	DNA-binding protein HU-alpha (HU-2)	-1.13515
STM1118	CDS	ycdC	putative transcriptional repressor (TetR/AcrR family)	-1.12851
STM1152	CDS	ycfO	putative glycosyl hydrolase	-1.12621
STM2923	CDS	sodA	superoxide dismutase, manganese	-1.12552
STM_sRNA_SraC_RyeA				-1.12319
STM1837	Entrez-CDS	nuoG	NADH dehydrogenase I chain G	-1.12217
STM1777	CDS	cbiO	synthesis of vitamin B12 adenosyl cobalamide precursor	-1.10001
STM3228	CDS	yjgK	putative cytoplasmic protein	-1.08999
STM2049	CDS	rseA	anti sigma E (sigma 24) factor, negative regulator	-1.0883
STM2639	CDS	damX	membrane protein	-1.08504
STM0466	CDS	sdhC	succinate dehydrogenase, cytochrome b556	-1.08113
STM0082	CDS	rpsB	30S ribosomal subunit protein S2	-1.07251
STM3325				-1.06996
STM3060	CDS	tnpA_1	IS200 transposase	-1.06513
STM1881	CDS	hisJ	ABC superfamily (bind_prot), histidine transport protein	-1.06388
STM0959	CDS		Gifsy-2 prophage; integrase	-1.05184
STM2214	CDS	rimM	16S rRNA processing protein	-1.03448
STM2378	CDS	yqjC	putative periplasmic protein	-1.03421
STM2795	CDS	trxA	thioredoxin 1, redox factor	-1.03126
STM3288	CDS		putative inner membrane protein	-1.02892
STM0013	CDS	apaG	putative cytoplasmic protein	-0.996761
STM2018	CDS	flk	Couples flagellar P- and L-ring assembly to flagellar morphogenesis; cell division	-0.996643
STM3797	CDS		putative secreted protein	1.04303
STM3485				1.08396
STM4521	CDS	pudB	Propanediol utilization: polyhedral bodies	1.14826
STM4522	CDS	rseB	anti sigma E (sigma 24) factor, negative regulator	1.19499
STM4361	Entrez-CDS	fnr	transcriptional regulator	1.28464
STM3915	CDS		putative secreted protein	1.41207
STM4468	CDS	pspC	phage shock protein; regulatory gene, activates expression of psp operon with PspB	1.43701
STM4055	CDS	pagD	PhoP regulated	1.46134
STM4170	CDS		putative periplasmic protein	1.56036
STM4329	CDS		putative periplasmic transport protein	2.06795
STM4561	CDS	glgS	glycogen biosynthesis, rpoS dependent	2.15182
STM4562	CDS		putative cytoplasmic protein	2.38529
STM4311	CDS		putative outer membrane lipoprotein	2.69538

## Sheet: 4. Stat_Hfq
Name	STM Gene type	STM Gene symbol	STM Function	Log2 (Fold change value)
STM1728	CDS	yciG	putative cytoplasmic protein	-5.4199
STM1513	CDS		putative cytoplasmic protein	-5.40066
STM1730	CDS	yciE	putative cytoplasmic protein	-4.39535
STM0359	CDS		putative cytoplasmic protein	-4.0315
STM1261	CDS		putative cytoplasmic protein	-3.84014
STM1868A	CDS		putative protein	-3.60054
STM0982	CDS	himD	integration host factor (IHF), beta subunit; site-specific recombination	-3.49562
STM1121	CDS	ymdF	putative cytoplasmic protein	-3.31084
STM3060	CDS	ygfE	putative cytoplasmic protein	-3.23111
STM0465	CDS	ybaY	glycoprotein/polysaccharide metabolism	-3.14282
STM1732	CDS	ompW	outer membrane protein W; colicin S4 receptor; putative transporter	-3.07424
CHIP7_STM3916	pseudogene	rhoL	pseudogene; no in-frame start	-2.98793
STM2826	CDS	csrA	carbon storage regulator	-2.96398
STM0759	CDS	ybgS	putative homeobox protein	-2.89066
STM1705	CDS	osmB	osmotically inducible lipoprotein	-2.677
STM4361	CDS	hfq	host factor I for bacteriophage Q beta replication, a growth-related protein	-2.55561
STM0980	CDS	cmk	cytidine monophosphate (CMP) kinase	-2.51308
STM0474	CDS	ybaJ	putative cytoplasmic protein	-2.45615
CHIP7_STM1120	pseudogene	ycdF	pseudogene; in-frame stops following codons 5 and 21	-2.45361
STM_sRNA_RFN				-2.44669
STM2581	CDS	rnc	RNase III, ds RNA	-2.44256
STM4552	CDS		putative inner membrane protein	-2.44233
STM2795	CDS	ygaU	putative LysM domain	-2.3938
STM0362	CDS		putative cytoplasmic protein	-2.39311
STM_sRNA_Alpha_RBS				-2.27515
STM3426	CDS	rpsH	30S ribosomal subunit protein S8, and regulator	-2.25003
STM3649	CDS	cspA	major cold shock protein 7.4, transcriptional activator of hns	-2.21476
STM3424	CDS	rplR	50S ribosomal subunit protein L18	-2.1748
STM3427.S	Entrez-CDS	rpsN	30S ribosomal subunit protein S14	-2.12343
STM3430	CDS	rplN	50S ribosomal subunit protein L14	-2.08873
STM1733	CDS		putative ferredoxin	-2.08596
STM_sRNA_SraJ				-2.04799
STM4147	CDS	secE	preprotein translocase IISP family, membrane subunit	-2.04369
STM1514	CDS	ydeJ	putative Competence-damaged protein	-2.01806
STM1191	CDS	rpmF	50S ribosomal subunit protein L32	-2.01153
STM2354	CDS	hisJ	ABC superfamily (bind_prot), histidine transport protein	-1.99125
STM0384	CDS	psiF	induced by phosphate starvation	-1.98338
STM3448	CDS	rpsL	30S ribosomal subunit protein S12	-1.97884
STM1263	CDS		putative periplasmic protein	-1.92608
STM3425	CDS	rplF	50S ribosomal subunit protein L6	-1.90017
STM4092	CDS	hslV	peptidase component of the HslUV protease	-1.89839
STM1079	CDS	yccV	putative inner membrane protein	-1.89535
STM1729	CDS	yciF	putative cytoplasmic protein	-1.88862
STM1810	CDS		putative cytoplasmic protein	-1.87157
STM0383	CDS	yaiB	putative cytoplasmic protein	-1.86595
STM1371	CDS	sufC	putative ABC superfamily (atp_bind) transport protein	-1.86134
STM2923	CDS		putative cytoplasmic protein	-1.8483
STM1336	CDS	rplT	50S ribosomal subunit protein L20	-1.8429
STM3423	CDS	rpsE	30S ribosomal subunit protein S5	-1.83461
STM2336	CDS		putative cytoplasmic protein	-1.78595
STM4233	CDS	ubiC	chorismate pyruvate lyase	-1.78497
STM3415	CDS	rpoA	RNA polymerase, alpha subunit	-1.78407
STM1427	CDS	cfa	cyclopropane fatty acyl phospholipid synthase	-1.76407
STM0944	CDS	yljA	putative cytoplasmic protein	-1.72736
STM1813	CDS	ycgL	putative cytoplasmic protein	-1.71324
STM1335	CDS	rpmI	50S ribosomal subunit protein L35	-1.71087
STM4009	CDS	typA	GTP-binding elongation factor family protein	-1.70437
STM_sRNA_t44				-1.69625
STM3418	CDS	rpsM	30S ribosomal subunit protein S13	-1.68246
STM1727	CDS	trpA	tryptophan synthase, alpha protein	-1.67451
STM2431	CDS	ptsH	PTS family, Hpr protein, phosphohistidinoprotein-hexose phosphotransferase	-1.63621
STM2098	CDS	galF	putative glucose-1-phosphate uridylyltransferase (UDP-glucose pyrophosphorylase), non-catalytic subunit	-1.63381
STM2794	CDS	ygaE	putative transcriptional repressor (GntR familiy)	-1.58044
STM3325	CDS	yrbL	putative cytoplasmic protein	-1.56087
STM1444	CDS	slyA	transcriptional regulator for hemolysin (MarR family)	-1.55491
STM1797	CDS	ymgE	putative transglycosylase-associated protein	-1.53513
STM3414	CDS	rplQ	50S ribosomal subunit protein L17	-1.53428
STM3345	CDS	rplM	50S ribosomal subunit protein L13	-1.53414
STM1374	CDS	ynhA	putative SufE protein probably involved in Fe-S center assembly	-1.51256
STM2797	CDS		putative regulatory protein, arsR family	-1.48463
STM1515	CDS	ydeI	putative periplasmic protein	-1.48353
STM3447	CDS	rpsG	30S ribosomal subunit protein S7, initiates assembly	-1.47287
STM1123	CDS		putative periplasmic protein	-1.42558
STM0084	CDS		putative sulfatase	-1.42385
STM2069	CDS	yeeY	putative transcriptional regulator, LysR family	-1.42226
STM3422	CDS	rpmD	50S ribosomal subunit protein L30	-1.41604
STM2408	CDS	mntH	Nramp family, manganese/divalent cation transport prortein	-1.41209
STM2337	CDS	ackA	acetate kinase A (propionate kinase 2)	-1.41138
STM0466	CDS	ybaZ	putative methyltransferase	-1.41055
STM3154	CDS		putative ATP-dependent RNA helicase-like protein	-1.40871
STM3436	CDS	rpsS	30S ribosomal subunit protein S19	-1.40355
STM0807	CDS	ybhL	putative permease	-1.38755
STM0616	CDS	rnk	regulator of nucleoside diphosphate kinase	-1.37653
STM3230	CDS	yqjE	putative inner membrane protein	-1.3665
STM1289	CDS	yeaD	putative enzymes related to aldose 1-epimerase	-1.35056
STM2387	CDS	sixA	phosphohistidine phosphatase	-1.34283
STM1851	CDS		putative cytoplasmic protein	-1.30543
STM1877	CDS		putative amidohydrolase	-1.29698
STM0080	CDS		putative outer membrane lipoprotein	-1.29271
STM2860	CDS	ygbA	putative cytoplasmic protein	-1.29244
STM0780	CDS		putative outer membrane or exported	-1.28855
STM1294	CDS	ansA	cytoplasmic L-asparaginase I	-1.27615
STM3647	CDS	yiaF	putative outer membrane lipoprotein	-1.26846
STM3421	CDS	rplO	50S ribosomal subunit protein L15	-1.25963
STM2355	CDS	argT	ABC superfamily (bind_prot), lysine/arginine/ornithine transport protein	-1.25477
STM1811	CDS	ycgN	putative cytoplasmic protein	-1.24767
STM0185	CDS	yadB	putative glutamyl t-RNA synthetase	-1.23496
STM1986	CDS	yedP	putative hydrolase of the HAD superfamily	-1.22986
STM4088	CDS	yiiU	putative cytoplasmic protein	-1.22493
STM4150	CDS	rplA	50S ribosomal subunit protein L1, regulates synthesis of L1 and L11	-1.21327
STM1339	CDS	himA	integration host factor (IHF), alpha subunit	-1.21096
STM3270	CDS	yhbP	putative cytoplasmic protein	-1.1967
STM1959	CDS	fliC	flagellar biosynthesis; flagellin, filament structural protein	-1.19656
STM1905	CDS	yecO	putative SAM-dependent methyltransferases	-1.18617
STM3431	CDS	rpsQ	30S ribosomal subunit protein S17	-1.17227
STM1721	CDS	trpH	trpR controlled transcriptional unit in the 5' upstream region of the trp operon	-1.17205
STM2675	CDS	rimM	16S rRNA processing protein	-1.16973
STM1202	CDS	ycfH	putative metal-dependent hydrolase	-1.1644
STM1665	CDS		putative cytoplasmic protein	-1.14045
STM2965	CDS	yqcC	putative cytoplasmic protein	-1.13604
STM3428	CDS	rplE	50S ribosomal subunit protein L5	-1.13323
STM1208	CDS	ycfN	putative cytoplasmic protein	-1.12828
STM1725	CDS	trpC	bifunctional: N-(5-phosphoribosyl)anthranilate isomerase; indole-3-glycerolphosphate synthetase	-1.12151
STM0473	CDS	hha	hemolysin expression modulating protein (involved in environmental regulation of virulence factors)	-1.11826
STM2213	CDS	yeiU	putative permease	-1.10413
STM2335	CDS	yfbU	putative cytoplasmic protein	-1.10095
STM0731	CDS		putative inner membrane protein	-1.10031
STM1344	CDS	ydiV	putative Diguanylate cyclase/phosphodiesterase domain 1	-1.09092
STM1296	CDS	ydjA	putative oxidoreductase	-1.09055
STM2356	CDS	ubiX	3-octaprenyl-4-hydroxybenzoate carboxy-lyase	-1.08456
STM1891	CDS	znuA	ABC superfamily (bind_prot) high affinity Zn transport protein	-1.07788
STM0536	CDS	ppiB	peptidyl-prolyl cis-trans isomerase B (rotamase B)	-1.07306
STM1954	CDS	fliY	putative periplasmic binding transport protein	-1.07175
STM2649	CDS	trxC	thioredoxin 2, redox factor	-1.06983
STM1812	CDS	ycgM	putative Fumarylacetoacetate (FAA) hydrolase family	-1.06839
STM2087	CDS	rfbV	LPS side chain defect: abequosyltransferase	-1.06688
STM4152	CDS	rplL	50S ribosomal subunit protein L7/L12	-1.04893
STM2070	CDS	yeeZ	putative dehydratase	-1.03862
STM1902	CDS	yecD	putative isochorismatase	-1.03859
STM3433	CDS	rplP	50S ribosomal subunit protein L16	-1.03854
STM1439	CDS	ydhF	putative aldo/keto reductase	-1.03784
STM2080	CDS	udg	UDP-glucose/GDP-mannose dehydrogenase	-1.03662
STM1952	CDS	yecS	putative ABC-type amino acid transporter, permease component	-1.03594
STM1586	CDS		putative periplasmic protein	-1.03251
STM2523	CDS	gcpE	putative protein, involved in density-dependent regulation of peptidoglycan biosynthesis	-1.02996
STM3711	CDS	rfaF	ADP-heptose; LPS heptosyltransferase 1	-1.0276
STM3159	CDS	exbB	uptake of enterochelin; tonB-dependent uptake of B colicins	-1.02675
STM2922	CDS		putative 3-polyprenyl-4-hydroxybenzoate decarboxylase and related decarboxylase	-1.02417
STM1190	CDS	yceD	putative metal-binding	-1.02319
STM4141	CDS		putative cytoplasmic protein	-1.01935
STM1343	CDS	nlpC	lipoprotein	-1.01513
STM2688	CDS	smpB	small protein B; putative tmRNA-binding protein	-1.0142
STM3406	CDS	def	peptide deformylase	-1.00574
STM1658	CDS	ydaL	putative Smr domain	-1
STM3156	CDS		putative cytoplasmic protein	-0.99527
STM2473	CDS	talA	transaldolase A	0.999515
STM0552	CDS	fimW	putative fimbrial protein	1.01804
STM0687	CDS	ybfM	putative outer membrane protein	1.04984
STM1238	CDS	icdA	isocitrate dehydrogenase in e14 prophage, specific for NADP+	1.05504
STM2304	CDS	pmrD	polymyxin resistance protein B	1.05904
STM1048	CDS		Gifsy-2 prophage; host specificity protein J, phage lambda	1.07929
STM1494	CDS		ABC-type transport systems, permease components	1.08642
STM0602	CDS	ybdH	putative glycerol dehydrogenase	1.09266
STM2761	CDS		putative inner membrane protein	1.09658
STM1691	CDS	pspF	transcription activator	1.09827
STM3402	CDS	yrdC	putative translation factor	1.11971
STM1278	CDS	yeaN	putative MFS family transport protein (amino acid/amine transport)	1.12106
STM0665	CDS	gltI	ABC superfamily (bind_prot), glutamate/aspartate transporter	1.12124
STM1493	CDS		putative periplasmic component, ABC transport system	1.12275
STM_PSLT051	CDS		putative cytoplasmic protein	1.17053
STM0442	CDS	cyoB	cytochrome o ubiquinol oxidase subunit I	1.18111
STM1030	CDS		Gifsy-2 prophage	1.18681
STM1492	CDS		putative binding-protein-dependent transport system, inner membrane component	1.20303
STM4045	CDS	rhaD	rhamnulose-1-phosphate aldolase	1.21516
STM4105	CDS	metF	5,10-methylenetetrahydrofolate reductase	1.22166
STM0256	CDS	yafC	putative transcriptional regulator, LysR family	1.22558
STM1037	CDS		Gifsy-2 prophage; probable minor tail protein	1.22948
STM1400	CDS	sseC	Secretion system effector	1.23743
STM3965	CDS	metE	5-methyltetrahydropteroyltriglutamate-homocysteine S-methyltransferase	1.25874
STM1290	CDS	gapA	glyceraldehyde-3-phosphate dehydrogenase A	1.2662
STM2665	CDS	yfiA	ribosome associated factor, stabilizes ribosomes against dissociation	1.29479
STM4060	CDS	cpxP	periplasmic repressor of cpx regulon by interaction with CpxA, rescue from transitory stresses	1.30154
STM1431	CDS	sodB	superoxide dismutase, iron	1.35696
STM1686	CDS	pspE	phage shock protein	1.38285
STM1244	CDS	pagD	PhoP regulated	1.38707
STM1603	CDS	yncJ	putative periplasmic protein	1.39328
CHIP7_STM2778	pseudogene		pseudogene; frameshift	1.43363
STM1867	CDS	pagK	PhoPQ-activated gene	1.45918
STM1419	CDS	yscR	Secretion system apparatus: homology with YscR of the secretion system of Yersinia	1.47327
STM0853	CDS	yliH	putative cytoplasmic protein	1.47484
STM1402	CDS	sseE	Secretion system effector	1.48669
STM2639	CDS	rseA	anti sigma E (sigma 24) factor, negative regulator	1.53351
STM1398	CDS	sseB	Secretion system effector	1.58375
STM1687	CDS	pspD	phage shock protein	1.59051
STM1689	CDS	pspB	phage shock protein; regulatory gene, activates expression of psp operon with PspC	1.60455
STM3410	CDS	mscL	mechanosensitive channel	1.62395
STM1070	CDS	ompA	putative hydrogenase, membrane component	1.63646
STM1401	CDS	sseD	Secretion system effector	1.64004
STM1682	CDS	tpx	thiol peroxidase	1.6707
STM2796	CDS	yqaE	putative YqaE family transport protein	2.22497
STM1399	CDS	sscA	Secretion system chaparone	2.30348
STM1397	CDS	sseA	Secretion system effector	2.41389
STM0688	CDS	ybfN	putative lipoprotein	2.81852
STM1601	CDS	ugtL	putative membrane protein: homology with chitinase from Schizosaccharomyces	2.82459
STM2585	CDS		Gifsy-1 prophage: similar to transpose	3.23227
STM1688	CDS	pspC	phage shock protein; regulatory gene, activates expression of psp operon with PspB	3.27264
STM1254	CDS		putative outer membrane lipoprotein	4.61462

## Sheet: 5. Log_Hfq
Name	STM Gene type	STM Gene symbol	STM Function	Log2 (Fold change value)
STM1172	CDS	flgM	anti-FliA (anti-sigma) factor; also known as RflB protein	-4.88133
STM2872	CDS	prgJ	cell invasion protein; cytoplasmic	-4.70855
STM2873	CDS	prgI	cell invasion protein; cytoplasmic	-4.49454
STM2877	CDS	iagB	cell invasion protein	-4.19071
STM1090	CDS	pipC	Pathogenicity island encoded protein: homologous to ipgE of Shigella	-3.99215
STM2895	CDS	invB	surface presentation of antigens; secretory proteins	-3.63551
STM2893	CDS	invI	surface presentation of antigens; secretory proteins	-3.62281
STM1961	CDS	fliS	flagellar biosynthesis; repressor of class 3a and 3b operons (RflA activity)	-3.5943
STM1089	CDS		putative inner membrane protein	-3.43093
STM1975	CDS	fliL	flagellar biosynthesis	-2.76588
STM2870	CDS		putative inner membrane protein	-2.56701
STM2881	CDS	iacP	putative acyl carrier protein	-2.56261
STM1730	CDS	yciE	putative cytoplasmic protein	-2.41864
STM4239	CDS		putative cytoplasmic protein	-2.37705
STM1978	CDS	fliO	flagellar biosynthesis	-2.29368
STM1300	CDS		putative periplasmic protein	-2.27607
STM1920	CDS	cheW	purine-binding chemotaxis protein; regulation	-2.1584
STM4257	CDS		putative inner membrane or exported	-2.12038
STM4361	CDS	hfq	host factor I for bacteriophage Q beta replication, a growth-related protein	-2.05015
STM3598	CDS		putative L-asparaginase	-2.02766
STM1705	CDS	osmB	osmotically inducible lipoprotein	-1.95258
STM3578	CDS	yhhP	small ubiquitous protein required for normal growth	-1.83701
STM2312	CDS	elaA	putative acyltransferase	-1.83574
STM2889	CDS	spaQ	surface presentation of antigens; secretory proteins	-1.8051
STM0465	CDS	ybaY	glycoprotein/polysaccharide metabolism	-1.79756
STM1798	CDS	ycgR	putative inner membrane protein	-1.79204
STM1180	CDS	flgH	flagellar biosynthesis, basal-body outer-membrane L (lipopolysaccharide layer) ring protein	-1.78927
STM2879	CDS	sicP	chaparone, related to virulence	-1.7144
STM_sRNA_SraJ				-1.69744
STM3155	CDS		putative cytoplasmic protein	-1.65347
STM4262	CDS		putative ABC-type bacteriocin/lantibiotic exporter, contain an N-terminal double-glycine peptidase domain	-1.61761
STM1515	CDS	ydeI	putative periplasmic protein	-1.56041
STM4561	CDS	osmY	hyperosmotically inducible periplasmic protein, RpoS-dependent stationary phase gene	-1.54674
STM1367	CDS	ydiH	putative cytoplasmic protein	-1.53116
STM1629	CDS	STM1629	putative dipicolinate reductase	-1.53093
STM1301	CDS		putative mutator MutT protein	-1.46217
STM1329	CDS		putative inner membrane protein	-1.45048
STM1959	CDS	fliC	flagellar biosynthesis; flagellin, filament structural protein	-1.4445
STM3156	CDS		putative cytoplasmic protein	-1.44005
STM1146	CDS	ymdA	putative periplasmic protein	-1.43275
STM1594	CDS	srfB	ssrAB activated gene	-1.39834
STM0359	CDS		putative cytoplasmic protein	-1.3528
STM2888	CDS	spaR	surface presentation of antigens; secretory proteins	-1.26209
STM0759	CDS	ybgS	putative homeobox protein	-1.21296
STM0966	CDS	dmsC	anaerobic dimethyl sulfoxide reductase, subunit C	-1.21015
STM4260	CDS		membrane permease, predicted cation efflux pump	-1.20912
STM1173	CDS	flgA	flagellar biosynthesis; assembly of basal-body periplasmic P ring	-1.19945
STM1239	CDS		putative cytoplasmic protein	-1.19264
STM3089	CDS	yqgD	putative inner membrane protein	-1.19239
STM2890	CDS	spaP	surface presentation of antigens; secretory proteins	-1.16379
STM1055	CDS		Gifsy-2 prophage	-1.15757
STM2311	CDS	elaB	putative inner membrane protein	-1.15672
STM2900	CDS	invH	invasion protein	-1.15348
STM3445	CDS	tufA	protein chain elongation factor EF-Tu (duplicate of tufB)	-1.14934
STM1976	CDS	fliM	flagellar biosynthesis, component of motor switch and energizing	-1.12905
STM2206	CDS	fruF	phosphoenolpyruvate-dependent sugar phosphotransferase system, EIIA 2	-1.08567
STM4258	CDS		putative methyl-accepting chemotaxis protein	-1.07426
STM1729	CDS	yciF	putative cytoplasmic protein	-1.07326
STM1833	CDS		putative inner membrane protein	-1.06319
STM3154	CDS		putative ATP-dependent RNA helicase-like protein	-1.05609
STM4512	CDS	iadA	isoaspartyl dipeptidase	-1.03986
STM4514.S	Entrez-CDS	yjiH	putative inner membrane protein	-1.00667
STM1977	CDS	fliN	flagellar biosynthesis, component of motor switch and energizing	-1.00662
STM1119	CDS	wraB	trp-repressor binding protein	-0.99717
STM1972	CDS	fliI	flagellum-specific ATP synthase	-0.989924
STM3052	CDS		putative outer membrane protein	0.999133
STM2747	CDS		putative cytoplasmic protein	1.00437
STM0440	CDS	cyoD	cytochrome o ubiquinol oxidase subunit IV	1.00525
STM3614	CDS	dctA	DAACS family, C4-dicarboxylic acids transport protein	1.01572
STM1599	CDS	pdgL	Periplasmic dipeptidase for D-ala-D-ala digestion in peptidoglycan	1.01717
STM1530	CDS		putative outer membrane protein	1.03873
STM2085	CDS	rfbN	LPS side chain defect: rhamnosyl transferase	1.05977
STM1761	CDS	narI	nitrate reductase 1, cytochrome b(NR), gamma subunit	1.08512
STM1076	CDS	mgsA	methylglyoxal synthase	1.08962
STM3633	CDS		putative bacterial regulatory proteins, lacI family	1.12218
STM0581	CDS		putative regulatory protein	1.12448
STM2378	CDS	fabB	3-oxoacyl-[acyl-carrier-protein] synthase I	1.12717
STM3456	CDS	yheV	putative cytoplasmic protein	1.12769
STM1253	CDS		putative inner membrane protein	1.13937
STM4468	CDS	yjgK	putative cytoplasmic protein	1.16062
STM2448	CDS	yfeZ	putative inner membrane protein	1.16438
STM0441	CDS	cyoC	cytochrome o ubiquinol oxidase subunit III	1.20649
STM_PSLT085	CDS	traR	conjugative transfer	1.21546
STM3461	CDS		putative cytoplasmic protein	1.24533
STM3029.S	Entrez-CDS	stdA	putative fimbrial-like protein	1.24857
STM3030	CDS		putative periplasmic protein	1.27599
STM2256	CDS	napB	periplasmic nitrate reductase, small subunit, cytochrome C550, in complex with NapA	1.28495
STM1546	CDS		putative monooxygenase	1.30098
STM3628	CDS	dppC	ABC superfamily (membrane), dipeptide transport protein 2	1.31217
STM3265	CDS	yraN	putative endonuclease	1.42983
STM3451	CDS	yheN	putative ACR involved in intracellular sulfur reduction	1.44295
STM3636	CDS	lpfE	long polar fimbrial minor protein	1.46094
STM3337	CDS	nanE	putative ManNAc-6P epimerase	1.50413
STM0702	CDS	kdpE	response regulator in two-component regulatory system with KdpD, regulates kdp operon encoding a high-affinity K translocating ATPase (OmpR family)	1.52858
STM2685	CDS	smpA	small membrane protein A	1.54353
STM2387	CDS	sixA	phosphohistidine phosphatase	1.58055
STM3361	CDS	yhcN	putative outer membrane protein	1.59588
STM3374.1n	Entrez-CDS	rpsN	30S ribosomal subunit protein S14	1.6013
STM3108	CDS	yggL	putative cytoplasmic protein	1.66292
STM1767	CDS	narL	response regulator in two-component regulatory system with NarX (or NarQ), regulates anaerobic respiration and fermentation (LuxR/UhpA familiy)	1.69737
STM2260	CDS	napD	periplasmic nitrate reductase	1.72981
STM2447	CDS		putative outer membrane lipoprotein	2.04935
STM2261	CDS	napF	ferredoxin-type protein: electron transfer	2.06179
STM0688	CDS	ybfN	putative lipoprotein	2.11481
STM2438	CDS	yfeK	putative periplasmic protein	2.19496
STM0735	CDS	sdhB	succinate dehydrogenase, Fe-S protein	2.20113
STM3374.1n	Entrez-CDS	-	hypothetical protein	2.40859
STM2038	CDS	pduA	Propanediol utilization: polyhedral bodies	3.01806
STM2259	CDS	napA	periplasmic nitrate reductase, large subunit, in complex with NapB	3.82809
STM1254	CDS		putative outer membrane lipoprotein	4.11003

## Sheet: 6. SmpB_regulated_genes
Name	STM Gene type	STM Gene symbol	STM Function
CHIP7_STM1120	pseudogene	ycdF	pseudogene; in-frame stops following codons 5 and 21
CHIP7_STM1465	pseudogene	malX	pseudogene; frameshift
CHIP7_STM2693	RNA	10Sa	regulatory RNA
CHIP7_STM3654	pseudogene		pseudogene; in-frame stop following codon 23
CHIP7_STM3916	pseudogene	rhoL	pseudogene; no in-frame start
STM_PSLT003	CDS	repC	DNA replication
STM_PSLT010	CDS		putative outer membrane protein
STM_PSLT046	CDS		putative carbonic anhydrase
STM_PSLT093	CDS		conjugative transfer:
STM_PSLT102	CDS	traS	conjugative transfer: surface exclusion
STM_sRNA_Cobalamin A
STM_sRNA_RNaseP	RNA	rnpB	regulatory RNA
STM_sRNA_rne5	pseudogene		pseudogene; in-frame stop following codon 97; no start near coli start
STM_sRNA_SraJ
STM_sRNA_t44
STM_sRNA_THI
STM_sRNA_tke1
STM0013	CDS	dnaJ	heat shock protein, DnaJ and GrpE stimulates ATPase activity of DnaK
STM0043	CDS	rpsT	30S ribosomal subunit protein S20
STM0055	CDS		putative oxalacetate decarboxylase, subunit alpha
STM0068	CDS	caiF	transcriptional regulator of cai and fix operon
STM0082	CDS		putative secreted protein
STM0090	CDS	ksgA	S-adenosylmethionine-6-N',N'-adenosyl (rRNA) dimethyltransferase; kasugamycin resistance
STM0096	CDS	hepA	RNA polymerase associated protein, putative SNF2 family RNA helicase
STM0113	CDS	leuA	2-isopropylmalate synthase
STM0119	CDS	yabB	putative cytoplasmic protein
STM0134	CDS	lpxC	UDP-3-O-acyl N-acetylglucosamine deacetylase
STM0141	CDS	guaC	GMP reductase
STM0159	CDS		putative restriction endonuclease
STM0186	CDS	dksA	dnaK suppressor protein
STM0192	CDS	fhuC	ABC superfamily (atp_bind), hydroxymate-dependent iron transport
STM0216	CDS	rpsB	30S ribosomal subunit protein S2
STM0217	CDS	tsf	protein chain elongation factor EF-Ts
STM0221	CDS	uppS	undecaprenyl pyrophosphate synthetase (di-trans,poly-cis-decaprenylcistransferase)
STM0226	CDS	lpxD	UDP-3-O-(3-hydroxymyristoyl)-glucosamine n-acyltransferase
STM0247	CDS	abc	putative ABC superfamily (atp_bind) transport system
STM0255	CDS	yafB	2,5-diketo-D-gluconate reductase B
STM0256	CDS	yafC	putative transcriptional regulator, LysR family
STM0278	CDS		putative periplasmic protein
STM0295	CDS		putative cytoplasmic protein
STM0307	CDS		homology to Shigella VirG protein
STM0372	CDS	hemB	5-aminolevulinate dehydratase ( porphobilinogen synthase)
STM0397	CDS	phoB	response regulator in two-component regulatory system with PhoR (or CreC), regulates pho regulon (OmpR family)
STM0402	CDS		putative thiol - alkyl hydroperoxide reductase
STM0417	CDS	ribH	riboflavin synthase, beta chain
STM0446	CDS	bolA	morphogene; putative regulator of murein genes (BolA family)
STM0448	CDS	clpP	proteolytic subunit of clpA-clpP ATP-dependent serine protease, heat shock protein F21.5
STM0465	CDS	ybaY	glycoprotein/polysaccharide metabolism
STM0466	CDS	ybaZ	putative methyltransferase
STM0473	CDS	hha	hemolysin expression modulating protein (involved in environmental regulation of virulence factors)
STM0485	CDS	ybaB	putative cytoplasmic protein
STM0499	CDS	ybbI	putative heavy metal transcriptional repressor (MerR family)
STM0536	CDS	ppiB	peptidyl-prolyl cis-trans isomerase B (rotamase B)
STM0550	CDS	fimY	putative regulatory protein
STM0597	CDS	entB	2,3-dihydro-2,3-dihydroxybenzoate synthetase, isochorismatase
STM0599	CDS	ybdB	putative protein PaaI, possibly involved in aromatic compounds catabolism
STM0617	CDS	rna	RNase I, cleaves phosphodiester bond between any two nucleotides
STM0653	CDS	ybeL	putative cytoplasmic protein
STM0699	CDS		putative cytoplasmic protein
STM0708	CDS	ybfA	putative periplasmic protein
STM0712	CDS	ybgJ	putative carboxylase
STM0732	CDS	sdhC	succinate dehydrogenase, cytochrome b556
STM0741	CDS	cydB	cytochrome d terminal oxidase polypeptide subunit II
STM0749	CDS	pal	tol protein required for outer membrane integrity, uptake of group A colicins, and translocation of phage DNA to cytoplasm
STM0759	CDS	ybgS	putative homeobox protein
STM0782	CDS	modB	ABC superfamily (membrane), molybdate transporter
STM0807	CDS	ybhL	putative permease
STM0831	CDS	dps	stress response DNA-binding protein; starvation induced resistance to H2O2
STM0833	CDS	ompX	outer membrane protease, receptor for phage OX2
STM0853	CDS	yliH	putative cytoplasmic protein
STM0884	CDS		putative inner membrane protein; homology to SgaT from Vibrio
STM0944	CDS	yljA	putative cytoplasmic protein
STM0948	CDS		putative cytoplasmic protein
STM0953	CDS	infA	protein chain initiation factor IF-1
STM0959	CDS	lrp	regulator for lrp regulon and high-affinity branched-chain amino acid transport system; mediator of of leucine response (AsnC family)
STM0966	CDS	dmsC	anaerobic dimethyl sulfoxide reductase, subunit C
STM0971	CDS		putative cytoplasmic protein
STM0981	CDS	rpsA	30S ribosomal subunit protein S1
STM0982	CDS	himD	integration host factor (IHF), beta subunit; site-specific recombination
STM0997	CDS	ycbL	putative Metallo-beta-lactamase
STM0998	CDS	aspC	aspartate aminotransferase
STM1005	CDS		Gifsy-2 prophage; integrase
STM1044	CDS	sodC	Gifsy-2 prophage: superoxide dismutase precursor (Cu-Zn)
STM1066	CDS	rmf	ribosome modulation factor (involved in dimerization of 70S ribosomes)
STM1069	CDS	ycbG	putative cytoplasmic protein
STM1071	CDS	sulA	suppressor of lon; inhibitor of cell division and FtsZ ring formation upon DNA damage/inhibition, HslVU and Lon involved in its turnover
STM1072	CDS	yccR	putative DNA transformation protein
STM1076	CDS	mgsA	methylglyoxal synthase
STM1079	CDS	yccV	putative inner membrane protein
STM1084	CDS	yccK	putative sulfite reductase, gamma subunit
STM1089	CDS		putative inner membrane protein
STM1092	CDS	orfX	putative cytoplasmic protein
STM1111	CDS	yccD	putative cytoplasmic protein
STM1113	CDS	scsA	Suppression of copper sensitivity: putative copper binding protein
STM1119	CDS	wraB	trp-repressor binding protein
STM1121	CDS	ymdF	putative cytoplasmic protein
STM1123	CDS		putative periplasmic protein
STM1127	CDS		putative transcriptional regulator
STM1140	CDS	csgF	curli production assembly/transport component, 2nd curli operon
STM1172	CDS	flgM	anti-FliA (anti-sigma) factor; also known as RflB protein
STM1180	CDS	flgH	flagellar biosynthesis, basal-body outer-membrane L (lipopolysaccharide layer) ring protein
STM1206	CDS	ycfL	putative outer membrane lipoprotein
STM1207	CDS	ycfM	putative outer membrane lipoprotein
STM1233	CDS	ycfC	membrane associated protein of unknown function
STM1236	CDS		putative periplasmic protein
STM1244	CDS	pagD	PhoP regulated
STM1246	CDS	pagC	PhoP regulated: reduced macrophage survival
STM1249	CDS		putative periplasmic protein
STM1250	CDS		putative cytoplasmic protein
STM1286	CDS	mipA	scaffolding protein for murein-synthesizing holoenzyme
STM1291	CDS	yeaA	putative domain frequently associated with peptide methionine sulfoxide reductase
STM1300	CDS		putative periplasmic protein
STM1301	CDS		putative mutator MutT protein
STM1311	CDS	osmE	transcriptional activator of ntrL gene
STM1325	CDS	ydiZ	putative cytoplasmic protein
STM1329	CDS		putative inner membrane protein
STM1334.c	Entrez-CDS	infC	protein chain initiation factor IF-3
STM1335	CDS	rpmI	50S ribosomal subunit protein L35
STM1336	CDS	rplT	50S ribosomal subunit protein L20
STM1339	CDS	himA	integration host factor (IHF), alpha subunit
STM1367	CDS	ydiH	putative cytoplasmic protein
STM1371	CDS	sufC	putative ABC superfamily (atp_bind) transport protein
STM1377	CDS	lpp	murein lipoprotein, links outer and inner membranes
STM1378	CDS	pykF	pyruvate kinase I (formerly F), fructose stimulated
STM1393	CDS	ssaB	Secretion system apparatus
STM1396	CDS	ssaE	Secretion system effector
STM1397	CDS	sseA	Secretion system effector
STM1398	CDS	sseB	Secretion system effector
STM1399	CDS	sscA	Secretion system chaparone
STM1400	CDS	sseC	Secretion system effector
STM1401	CDS	sseD	Secretion system effector
STM1406	CDS	ssaG	Secretion system apparatus
STM1407	CDS	ssaH	Secretion system apparatus
STM1408	CDS	ssaI	Secretion system apparatus
STM1412	CDS	ssaL	Secretion system apparatus
STM1413	CDS	ssaM	Secretion system apparatus
STM1414	CDS	ssaV	Secretion system apparatus: homology with the LcrD family of proteins
STM1416	CDS	ssaO	Secretion system apparatus
STM1417	CDS	ssaP	Secretion system apparatus
STM1420	CDS	ssaS	Secretion system apparatus: homology with YscS of the secretion system of Yersinia
STM1432	CDS	ydhO	putative cell wall-associated hydrolase
STM1433	CDS	ydhD	putative glutaredoxin protein
STM1444	CDS	slyA	transcriptional regulator for hemolysin (MarR family)
STM1460	CDS	ydgK	putative inner membrane protein
STM1475	CDS	rstA	response regulator in two-component regulatory system with RstB (OmpR family)
STM1485	CDS		acid shock protein
STM1500	CDS	ynfD	putative outer membrane protein
STM1503	CDS	ynfB	putative periplasmic protein
STM1509	CDS	ydfZ	putative cytoplasmic protein
STM1513	CDS		putative cytoplasmic protein
STM1515	CDS	ydeI	putative periplasmic protein
STM1536	CDS		putative hydrogenase maturation protease
STM1562	CDS		putative periplasmic transport protein
STM1601	CDS	ugtL	putative membrane protein: homology with chitinase from Schizosaccharomyces
STM1603	CDS	yncJ	putative periplasmic protein
STM1630	CDS		putative inner membrane protein
STM1635	CDS		putative ABC-type polar amino acid transport system, ATPase component
STM1652	CDS	ynaF	putative universal stress protein
STM1659	CDS	ogt	O-6-alkylguanine-DNA/cysteine-protein methyltransferase
STM1661	CDS	ydaA	putative universal stress protein
STM1662	CDS	ynaJ	putative inner membrane protein
STM1683	CDS	tyrR	transcriptional regulator of aromatic amino acid biosynthesis genes (aroF, aroG, tyrA) and aromatic amino acid transport, has intrinsic ATPase and phosphatase activity (EBP family)
STM1705	CDS	osmB	osmotically inducible lipoprotein
STM1724	CDS	trpD	anthranilate synthase, component II, bifunctional: glutamine amidotransferase and phosphoribosylanthranilate transferase
STM1726	CDS	trpB	tryptophan synthase, beta protein
STM1727	CDS	trpA	tryptophan synthase, alpha protein
STM1728	CDS	yciG	putative cytoplasmic protein
STM1730	CDS	yciE	putative cytoplasmic protein
STM1732	CDS	ompW	outer membrane protein W; colicin S4 receptor; putative transporter
STM1751	CDS	hns	DNA-binding protein HLP-II (HU, BH2, HD, NS); pleiotropic regulator
STM1773	CDS	ychA	putative transcriptional regulator
STM1777	CDS	hemA	glutamyl tRNA reductase
STM1805	CDS	fadR	negative regulator for fad regulon and positive activator of fabA (GntR family)
STM1812	CDS	ycgM	putative Fumarylacetoacetate (FAA) hydrolase family
STM1833	CDS		putative inner membrane protein
STM1837	CDS	cspC	cold shock protein, multicopy suppresses mukB mutants, putative regulator
STM1840	CDS	yobG	putative inner membrane protein
STM1841	CDS		putative outer membrane or exported
STM1851	CDS		putative cytoplasmic protein
STM1854	CDS		putative inner membrane protein
STM1867	CDS	pagK	PhoPQ-activated gene
STM1891	CDS	znuA	ABC superfamily (bind_prot) high affinity Zn transport protein
STM1922	CDS	motB	enables flagellar motor rotation, linking torque machinery to cell wall
STM1954	CDS	fliY	putative periplasmic binding transport protein
STM1958	CDS	fliB	N-methylation of lysine residues in flagellin
STM1961	CDS	fliS	flagellar biosynthesis; repressor of class 3a and 3b operons (RflA activity)
STM1975	CDS	fliL	flagellar biosynthesis
STM1977	CDS	fliN	flagellar biosynthesis, component of motor switch and energizing
STM1978	CDS	fliO	flagellar biosynthesis
STM2025	CDS	cbiK	synthesis of vitamin B12 adenosyl cobalamide precursor
STM2030	CDS	cbiT	synthesis of vitamin B12 adenosyl cobalamide precursor
STM2036	CDS	pocR	Propanediol utilization: transcriptional regulation, AraC family
STM2038	CDS	pduA	Propanediol utilization: polyhedral bodies
STM2039	CDS	pudB	Propanediol utilization: polyhedral bodies
STM2059	CDS	yeeX	putative cytoplasmic protein
STM2070	CDS	yeeZ	putative dehydratase
STM2075	CDS	hisH	glutamine amidotransferase, subunit with HisF
STM2080	CDS	udg	UDP-glucose/GDP-mannose dehydrogenase
STM2092	CDS	rfbF	LPS side chain defect: glucose-1-phosphate cytidylyltransferase
STM2098	CDS	galF	putative glucose-1-phosphate uridylyltransferase (UDP-glucose pyrophosphorylase), non-catalytic subunit
STM2138	CDS		putative cytoplasmic protein
STM2148	CDS		putative periplasmic protein
STM2202	CDS	yeiH	putative inner membrane protein
STM2299	CDS	yfbG	paral putative transformylase
STM2311	CDS	elaB	putative inner membrane protein
STM2312	CDS	elaA	putative acyltransferase
STM2319	CDS	nuoK	NADH dehydrogenase I chain K
STM2322	CDS	nuoH	NADH dehydrogenase I chain H
STM2324	CDS	nuoF	NADH dehydrogenase I chain F
STM2335	CDS	yfbU	putative cytoplasmic protein
STM2336	CDS		putative cytoplasmic protein
STM2337	CDS	ackA	acetate kinase A (propionate kinase 2)
STM2355	CDS	argT	ABC superfamily (bind_prot), lysine/arginine/ornithine transport protein
STM2364	CDS	dedD	paral putative lipoprotein
STM2378	CDS	fabB	3-oxoacyl-[acyl-carrier-protein] synthase I
STM2395	CDS	pgtE	Phosphoglycerate transport: outer membrane protein E
STM2431	CDS	ptsH	PTS family, Hpr protein, phosphohistidinoprotein-hexose phosphotransferase
STM2434	CDS		putative cytoplasmic protein
STM2487	CDS	purC	phosphoribosylaminoimidazole-succinocarboxamide synthetase (SAICAR synthetase)
STM2488	CDS	nlpB	lipoprotein-34
STM2491	CDS	bcp	thiol peroxidase, thioredoxin dependent
STM2505	CDS		putative inner membrane protein
STM2506	CDS		putative inner membrane protein
STM2520	CDS	yfgL	putative serine/threonine protein kinase
STM2540	CDS	hscB	co-chaperone protein Hsc20, believed to be involved in assembly of Fe-S clusters
STM2544	CDS	yfhP	believed to be involved in assembly of Fe-S clusters
STM2559	CDS	cadA	lysine decarboxylase 1
STM2581	CDS	rnc	RNase III, ds RNA
STM2628	CDS		Gifsy-2 prophage; probable regulatory protein
STM2646	CDS	yfiD	putative formate acetyltransferase
STM2665	CDS	yfiA	ribosome associated factor, stabilizes ribosomes against dissociation
STM2673	CDS	rplS	50S ribosomal subunit protein L19
STM2674	CDS	trmD	tRNA (guanine-7-)-methyltransferase
STM2685	CDS	smpA	small membrane protein A
STM2688	CDS	smpB	small protein B; putative tmRNA-binding protein
STM2705	CDS		Fels-2 prophage
STM2747	CDS		putative cytoplasmic protein
STM2770	CDS	fljA	Flagellar synthesis: repressor of fliC
STM2780	CDS		homologue of pipB, putative pentapeptide repeats (8 copies)
STM2782	CDS	mig-14	putative transcription activator
STM2795	CDS	ygaU	putative LysM domain
STM2800	CDS		putative inner membrane protein
STM2801	CDS	ygaC	putative cytoplasmic protein
STM2857	CDS	hypD	putative hydrogenase expression/formation protein
STM2860	CDS	ygbA	putative cytoplasmic protein
STM2864	CDS	sitD	Salmonella iron transporter: fur regulated
STM2877	CDS	iagB	cell invasion protein
STM2925	CDS	nlpD	lipoprotein
STM2947	CDS	cysI	sulfite reductase, alpha subunit, NADPH dependent
STM2965	CDS	yqcC	putative cytoplasmic protein
STM2967	CDS	syd	interacts with secY
STM3004	CDS	ygdP	putative invasion protein; NTP pyrophosphohydrolase
STM3034	CDS		putative cytoplasmic protein
STM3055	CDS	gcvT	glycine cleavage complex protein T, aminomethyltransferase, tetrahydrofolate-dependent
STM3060	CDS	ygfE	putative cytoplasmic protein
STM3076	CDS	tktA	transketolase 1 isozyme
STM3106	CDS	ansB	periplasmic L-asparaginase II
STM3107	CDS	yggN	putative periplasmic protein
STM3151	CDS	yghW	putative cytoplasmic protein
STM3154	CDS		putative ATP-dependent RNA helicase-like protein
STM3209	CDS	rpsU	30S ribosomal subunit protein S21
STM3226	CDS	yqjA	putative DedA family, membrane protein
STM3229	CDS	yqjD	putative inner membrane protein
STM3240	CDS	tdcG	L-serine deaminase
STM3241	CDS	tdcE	pyruvate formate-lyase 4/ 2-ketobutyrate formate-lyase
STM3280.S	Entrez-CDS	deaD	cysteine sulfinate desulfinase
STM3281	CDS	nlpI	lipoprotein, cell division
STM3283	CDS	rpsO	30S ribosomal subunit protein S15
STM3309	CDS	yrbB	putative STAS domain
STM3321	CDS	yhbH	putative sigma N modulation factor
STM3344	CDS	rpsI	30S ribosomal subunit protein S9
STM3345	CDS	rplM	50S ribosomal subunit protein L13
STM3363	CDS	yhcO	putative cytoplasmic protein
STM3392	CDS	yhdV	putative outer membrane lipoprotein
STM3401	CDS	aroE	dehydroshikimate reductase
STM3402	CDS	yrdC	putative translation factor
STM3403	CDS	yrdD	putative DNA topoisomerase
STM3406	CDS	def	peptide deformylase
STM3415	CDS	rpoA	RNA polymerase, alpha subunit
STM3416	CDS	rpsD	30S ribosomal subunit protein S4
STM3417	CDS	rpsK	30S ribosomal subunit protein S11
STM3420	CDS	secY	preprotein translocase of IISP family, membrane subunit, putative ATPase
STM3421	CDS	rplO	50S ribosomal subunit protein L15
STM3424	CDS	rplR	50S ribosomal subunit protein L18
STM3425	CDS	rplF	50S ribosomal subunit protein L6
STM3426	CDS	rpsH	30S ribosomal subunit protein S8, and regulator
STM3427.S	Entrez-CDS	rpsN	30S ribosomal subunit protein S14
STM3428	CDS	rplE	50S ribosomal subunit protein L5
STM3429	CDS	rplX	50S ribosomal subunit protein L24
STM3430	CDS	rplN	50S ribosomal subunit protein L14
STM3431	CDS	rpsQ	30S ribosomal subunit protein S17
STM3432	CDS	rpmC	50S ribosomal subunit protein L29
STM3433	CDS	rplP	50S ribosomal subunit protein L16
STM3434	CDS	rpsC	30S ribosomal subunit protein S3
STM3436	CDS	rpsS	30S ribosomal subunit protein S19
STM3437	CDS	rplB	50S ribosomal subunit protein L2
STM3439	CDS	rplD	50S ribosomal subunit protein L4, regulates expression of S10 operon
STM3441	CDS	rpsJ	30S ribosomal subunit protein S10
STM3442	CDS	hopD	leader peptidase HopD
STM3443	CDS	bfr	bacterioferrin, an iron storage homoprotein
STM3444	CDS	bfd	regulatory or redox component complexing with Bfr, in iron storage and mobility
STM3445	CDS	tufA	protein chain elongation factor EF-Tu (duplicate of tufB)
STM3448	CDS	rpsL	30S ribosomal subunit protein S12
STM3451	CDS	yheN	putative ACR involved in intracellular sulfur reduction
STM3452	CDS	yheO	putative regulator
STM3499	CDS	yhgE	putative inner membrane protein
STM3505	CDS	feoA	ferrous iron transport protein A
STM3511	CDS	yhgI	putative Thioredoxin-like proteins and domain
STM3558	CDS		homology to death -on-curing protein of phage P1
STM3566	CDS		putative cytoplasmic protein
STM3578	CDS	yhhP	small ubiquitous protein required for normal growth
STM3595	CDS		putative phosphatase
STM3655	CDS	glyS	glycine tRNA synthetase, beta subunit
STM3702	CDS	grxC	glutaredoxin 3
STM3704	CDS	pmgI	phosphoglyceromutase
STM3721	CDS	rfaP	lipopolysaccharide core biosynthesis; phosphorylation of core heptose
STM3728	CDS	rpmB	50S ribosomal subunit protein L28
STM3809.S	Entrez-CDS	ibpA	small heat shock protein
STM3813	CDS	ccmG	heme lyase/disulfide oxidoreductase, cytochrome c-type biogenesis
STM3867	CDS	atpA	membrane-bound ATP synthase, F1 sector, alpha-subunit
STM3870	CDS	atpE	membrane-bound ATP synthase, F0 sector, subunit c
STM3888	CDS	yieP	putative regulatory protein, gntR family
STM3897	CDS	yifA	putative transcriptional regulator, LysR family
STM3901	CDS	ilvG	acetolactate synthase II, large subunit, fragment 1, cryptic
STM3902	CDS	ilvM	acetolactate synthase II, small subunit
STM3915	CDS	trxA	thioredoxin 1, redox factor
STM3973	CDS	tatA	component of Sec-independent protein secretion pathway
STM4002	CDS		putative cytoplasmic protein
STM4048	CDS	rhaS	positive regulator for rhaBAD operon (AraC/XylS family)
STM4055	CDS	sodA	superoxide dismutase, manganese
STM4066	CDS		putative sugar kinase, ribokinase family
STM4088	CDS	yiiU	putative cytoplasmic protein
STM4092	CDS	hslV	peptidase component of the HslUV protease
STM4096	CDS	rpmE	50S ribosomal subunit protein L31
STM4100	CDS	metB	cystathionine gamma-synthase
STM4118	CDS	yijP	putative Integral membrane protein
STM4126	CDS	udhA	soluble pyridine nucleotide transhydrogenase
STM4130	CDS	btuB	outer membrane receptor for transport of vitamin B12, E colicins, and bacteriophage BF23
STM4131	CDS	murI	glutamate racemase
STM4137	CDS	murB	UDP-N-acetylenolpyruvoylglucosamine reductase
STM4141	CDS		putative cytoplasmic protein
STM4150	CDS	rplA	50S ribosomal subunit protein L1, regulates synthesis of L1 and L11
STM4152	CDS	rplL	50S ribosomal subunit protein L7/L12
STM4170	CDS	hupA	DNA-binding protein HU-alpha (HU-2)
STM4182	CDS	metA	homoserine transsuccinylase
STM4239	CDS		putative cytoplasmic protein
STM4240	CDS	yjbJ	putative cytoplasmic protein
STM4255	CDS		putative cytoplasmic protein
STM4257	CDS		putative inner membrane or exported
STM4301	CDS	dcuB	Dcu family, anaerobic C4-dicarboxylate transporter
STM4316	CDS		putative cytoplasmic protein
STM4319	CDS	phoN	non-specific acid phosphatase
STM4329	CDS	mopB	chaperone Hsp10, affects cell division
STM4335	CDS	ecnA	putative entericidin A precursor
STM4341	CDS	frdC	fumarate reductase, anaerobic, membrane anchor polypeptide
STM4361	CDS	hfq	host factor I for bacteriophage Q beta replication, a growth-related protein
STM4363	CDS	hflK	with HflC, part of modulator for protease specific for FtsH phage lambda cII repressor
STM4367	CDS	yjeB	putative negative regulator
STM4390	CDS		putative cytoplasmic protein
STM4392	CDS	priB	primosomal replication protein N
STM4393	CDS	rpsR	30S ribosomal subunit protein S18
STM4394	CDS	rplI	50S ribosomal subunit protein L9
STM4439	CDS	cybC	cytochrome b(562)
STM4468	CDS	yjgK	putative cytoplasmic protein
STM4475	CDS	valS	valine tRNA synthetase
STM4491	CDS		putative ATP-dependent Lon protease
STM4521	CDS	yjiS	putative cytoplasmic protein
STM4535	CDS		putative PTS permease
STM4561	CDS	osmY	hyperosmotically inducible periplasmic protein, RpoS-dependent stationary phase gene
STM4598	CDS	arcA	response regulator (OmpR family) in two-component regulatory system with ArcB (or CpxA), regulates genes in aerobic pathways

## Sheet: 7. AMM-1_SmpB
Name	STM Gene type	STM Gene symbol	STM Function	Log2 (Fold change value)
STM1408	CDS	ssaI	Secretion system apparatus	-4.41147
STM1603	CDS	yncJ	putative periplasmic protein	-3.85046
STM1867	CDS	pagK	PhoPQ-activated gene	-3.4815
CHIP7_STM2693	RNA	10Sa	regulatory RNA	-3.42384
STM1339	CDS	himA	integration host factor (IHF), alpha subunit	-3.4079
STM1406	CDS	ssaG	Secretion system apparatus	-3.31084
STM3505	CDS	feoA	ferrous iron transport protein A	-3.2691
STM1377	CDS	lpp	murein lipoprotein, links outer and inner membranes	-3.11588
STM_sRNA_tke1				-3.05226
STM1601	CDS	ugtL	putative membrane protein: homology with chitinase from Schizosaccharomyces	-3.04175
STM1413	CDS	ssaM	Secretion system apparatus	-2.86535
STM2665	CDS	yfiA	ribosome associated factor, stabilizes ribosomes against dissociation	-2.81781
STM0853	CDS	yliH	putative cytoplasmic protein	-2.7967
STM3424	CDS	rplR	50S ribosomal subunit protein L18	-2.78661
STM0833	CDS	ompX	outer membrane protease, receptor for phage OX2	-2.63097
STM1396	CDS	ssaE	Secretion system effector	-2.58451
STM1244	CDS	pagD	PhoP regulated	-2.5406
STM3427.S	Entrez-CDS	rpsN	30S ribosomal subunit protein S14	-2.51729
STM0082	CDS		putative secreted protein	-2.45987
STM0944	CDS	yljA	putative cytoplasmic protein	-2.44578
STM3034	CDS		putative cytoplasmic protein	-2.42079
STM1407	CDS	ssaH	Secretion system apparatus	-2.20783
STM1420	CDS	ssaS	Secretion system apparatus: homology with YscS of the secretion system of Yersinia	-2.20617
STM1805	CDS	fadR	negative regulator for fad regulon and positive activator of fabA (GntR family)	-1.99661
STM2138	CDS		putative cytoplasmic protein	-1.96651
STM1250	CDS		putative cytoplasmic protein	-1.95345
STM0831	CDS	dps	stress response DNA-binding protein; starvation induced resistance to H2O2	-1.93825
STM3430	CDS	rplN	50S ribosomal subunit protein L14	-1.9007
STM1119	CDS	wraB	trp-repressor binding protein	-1.82995
STM2795	CDS	ygaU	putative LysM domain	-1.79048
STM1630	CDS		putative inner membrane protein	-1.79048
STM1393	CDS	ssaB	Secretion system apparatus	-1.76696
STM1089	CDS		putative inner membrane protein	-1.75824
STM1652	CDS	ynaF	putative universal stress protein	-1.65045
STM2705	CDS		Fels-2 prophage	-1.64599
STM3702	CDS	grxC	glutaredoxin 3	-1.64385
STM3973	CDS	tatA	component of Sec-independent protein secretion pathway	-1.63245
STM0465	CDS	ybaY	glycoprotein/polysaccharide metabolism	-1.61107
STM2059	CDS	yeeX	putative cytoplasmic protein	-1.59784
STM2860	CDS	ygbA	putative cytoplasmic protein	-1.57281
STM1751	CDS	hns	DNA-binding protein HLP-II (HU, BH2, HD, NS); pleiotropic regulator	-1.54596
STM2688	CDS	smpB	small protein B; putative tmRNA-binding protein	-1.4775
STM4329	CDS	mopB	chaperone Hsp10, affects cell division	-1.47642
STM1635	CDS		putative ABC-type polar amino acid transport system, ATPase component	-1.46241
STM_sRNA_SraJ				-1.4513
STM1851	CDS		putative cytoplasmic protein	-1.4211
STM1773	CDS	ychA	putative transcriptional regulator	-1.41237
STM0473	CDS	hha	hemolysin expression modulating protein (involved in environmental regulation of virulence factors)	-1.37558
STM1416	CDS	ssaO	Secretion system apparatus	-1.36926
STM3392	CDS	yhdV	putative outer membrane lipoprotein	-1.35474
STM4088	CDS	yiiU	putative cytoplasmic protein	-1.35474
STM2098	CDS	galF	putative glucose-1-phosphate uridylyltransferase (UDP-glucose pyrophosphorylase), non-catalytic subunit	-1.34466
STM0997	CDS	ycbL	putative Metallo-beta-lactamase	-1.34258
STM1249	CDS		putative periplasmic protein	-1.34218
STM0192	CDS	fhuC	ABC superfamily (atp_bind), hydroxymate-dependent iron transport	-1.32826
STM1954	CDS	fliY	putative periplasmic binding transport protein	-1.29442
STM3229	CDS	yqjD	putative inner membrane protein	-1.29434
STM0971	CDS		putative cytoplasmic protein	-1.28837
STM3809.S	Entrez-CDS	ibpA	small heat shock protein	-1.28369
STM3406	CDS	def	peptide deformylase	-1.28214
STM0221	CDS	uppS	undecaprenyl pyrophosphate synthetase (di-trans,poly-cis-decaprenylcistransferase)	-1.26338
STM3403	CDS	yrdD	putative DNA topoisomerase	-1.26297
STM2559	CDS	cadA	lysine decarboxylase 1	-1.18324
CHIP7_STM3654	pseudogene		pseudogene; in-frame stop following codon 23	-1.1756
STM1891	CDS	znuA	ABC superfamily (bind_prot) high affinity Zn transport protein	-1.12775
STM2747	CDS		putative cytoplasmic protein	-1.12517
STM3363	CDS	yhcO	putative cytoplasmic protein	-1.11676
STM_sRNA_THI				-1.11432
STM1140	CDS	csgF	curli production assembly/transport component, 2nd curli operon	-1.09889
STM2070	CDS	yeeZ	putative dehydratase	-1.07625
STM3443	CDS	bfr	bacterioferrin, an iron storage homoprotein	-1.06085
STM0372	CDS	hemB	5-aminolevulinate dehydratase ( porphobilinogen synthase)	-1.00784
STM1123	CDS		putative periplasmic protein	0.996269
STM2674	CDS	trmD	tRNA (guanine-7-)-methyltransferase	1.00014
STM4066	CDS		putative sugar kinase, ribokinase family	1.00357
STM2364	CDS	dedD	paral putative lipoprotein	1.02269
STM0397	CDS	phoB	response regulator in two-component regulatory system with PhoR (or CreC), regulates pho regulon (OmpR family)	1.04183
STM0712	CDS	ybgJ	putative carboxylase	1.04603
STM4392	CDS	priB	primosomal replication protein N	1.04748
STM0055	CDS		putative oxalacetate decarboxylase, subunit alpha	1.05786
STM2487	CDS	purC	phosphoribosylaminoimidazole-succinocarboxamide synthetase (SAICAR synthetase)	1.06887
STM3813	CDS	ccmG	heme lyase/disulfide oxidoreductase, cytochrome c-type biogenesis	1.13561
STM0599	CDS	ybdB	putative protein PaaI, possibly involved in aromatic compounds catabolism	1.16328
STM3595	CDS		putative phosphatase	1.1712
CHIP7_STM1465	pseudogene	malX	pseudogene; frameshift	1.1841
STM1414	CDS	ssaV	Secretion system apparatus: homology with the LcrD family of proteins	1.1876
STM1044	CDS	sodC	Gifsy-2 prophage: superoxide dismutase precursor (Cu-Zn)	1.1958
STM3870	CDS	atpE	membrane-bound ATP synthase, F0 sector, subunit c	1.32934
STM3441	CDS	rpsJ	30S ribosomal subunit protein S10	1.32965
STM0597	CDS	entB	2,3-dihydro-2,3-dihydroxybenzoate synthetase, isochorismatase	1.33511
STM1977	CDS	fliN	flagellar biosynthesis, component of motor switch and energizing	1.35277
STM2864	CDS	sitD	Salmonella iron transporter: fur regulated	1.38008
STM3281	CDS	nlpI	lipoprotein, cell division	1.38641
STM4393	CDS	rpsR	30S ribosomal subunit protein S18	1.42299
STM4118	CDS	yijP	putative Integral membrane protein	1.44391
STM3437	CDS	rplB	50S ribosomal subunit protein L2	1.56366
STM2075	CDS	hisH	glutamine amidotransferase, subunit with HisF	1.56402
STM2395	CDS	pgtE	Phosphoglycerate transport: outer membrane protein E	1.56831
STM3433	CDS	rplP	50S ribosomal subunit protein L16	1.59715
STM4521	CDS	yjiS	putative cytoplasmic protein	1.65337
STM0113	CDS	leuA	2-isopropylmalate synthase	1.67283
STM3439	CDS	rplD	50S ribosomal subunit protein L4, regulates expression of S10 operon	1.69652
STM_PSLT046	CDS		putative carbonic anhydrase	1.74087
STM4100	CDS	metB	cystathionine gamma-synthase	1.80627
STM1724	CDS	trpD	anthranilate synthase, component II, bifunctional: glutamine amidotransferase and phosphoribosylanthranilate transferase	1.87523
STM1246	CDS	pagC	PhoP regulated: reduced macrophage survival	1.9497
STM3434	CDS	rpsC	30S ribosomal subunit protein S3	1.99
STM3428	CDS	rplE	50S ribosomal subunit protein L5	2.06984
STM1401	CDS	sseD	Secretion system effector	2.07245
STM2780	CDS		homologue of pipB, putative pentapeptide repeats (8 copies)	2.08229
STM3421	CDS	rplO	50S ribosomal subunit protein L15	2.18665
STM2782	CDS	mig-14	putative transcription activator	2.21628
STM3429	CDS	rplX	50S ribosomal subunit protein L24	2.31368
STM1399	CDS	sscA	Secretion system chaparone	2.43012
STM3416	CDS	rpsD	30S ribosomal subunit protein S4	2.4354
STM4319	CDS	phoN	non-specific acid phosphatase	2.4587
STM3417	CDS	rpsK	30S ribosomal subunit protein S11	2.47075
STM2299	CDS	yfbG	paral putative transformylase	2.74842
STM3420	CDS	secY	preprotein translocase of IISP family, membrane subunit, putative ATPase	3.05747

## Sheet: 8. AMM-2_SmpB
Name	STM Gene type	STM Gene symbol	STM Function	Log2 (Fold change value)
CHIP7_STM2693	RNA	10Sa	regulatory RNA	-7.00172
STM1066	CDS	rmf	ribosome modulation factor (involved in dimerization of 70S ribosomes)	-4.16648
CHIP7_STM1120	pseudogene	ycdF	pseudogene; in-frame stops following codons 5 and 21	-3.83284
STM1377	CDS	lpp	murein lipoprotein, links outer and inner membranes	-3.57081
STM1121	CDS	ymdF	putative cytoplasmic protein	-3.39257
STM1513	CDS		putative cytoplasmic protein	-3.23805
STM4329	CDS	mopB	chaperone Hsp10, affects cell division	-2.91305
STM1408	CDS	ssaI	Secretion system apparatus	-2.90978
STM3060	CDS	ygfE	putative cytoplasmic protein	-2.71838
STM2038	CDS	pduA	Propanediol utilization: polyhedral bodies	-2.64141
STM0708	CDS	ybfA	putative periplasmic protein	-2.61407
STM1509	CDS	ydfZ	putative cytoplasmic protein	-2.57577
STM0708	CDS	ybfA	putative periplasmic protein	-2.53797
STM1726	CDS	trpB	tryptophan synthase, beta protein	-2.51709
STM0216	CDS	rpsB	30S ribosomal subunit protein S2	-2.49704
STM1400	CDS	sseC	Secretion system effector	-2.43209
STM1485	CDS		acid shock protein	-2.407
STM2646	CDS	yfiD	putative formate acetyltransferase	-2.32698
STM_sRNA_RNaseP	RNA	rnpB	regulatory RNA	-2.30675
STM1250	CDS		putative cytoplasmic protein	-2.29288
STM0013	CDS	dnaJ	heat shock protein, DnaJ and GrpE stimulates ATPase activity of DnaK	-2.25515
STM1837	CDS	cspC	cold shock protein, multicopy suppresses mukB mutants, putative regulator	-2.19543
STM_sRNA_t44				-2.14148
STM_sRNA_Cobalamin A				-2.07627
STM2505	CDS		putative inner membrane protein	-2.05795
STM1854	CDS		putative inner membrane protein	-2.03544
STM4088	CDS	yiiU	putative cytoplasmic protein	-2.0262
STM1335	CDS	rpmI	50S ribosomal subunit protein L35	-2.0131
STM1336	CDS	rplT	50S ribosomal subunit protein L20	-1.99865
STM3345	CDS	rplM	50S ribosomal subunit protein L13	-1.99298
STM3427.S	Entrez-CDS	rpsN	30S ribosomal subunit protein S14	-1.93333
STM1416	CDS	ssaO	Secretion system apparatus	-1.87038
STM3426	CDS	rpsH	30S ribosomal subunit protein S8, and regulator	-1.83023
STM1413	CDS	ssaM	Secretion system apparatus	-1.82669
STM1291	CDS	yeaA	putative domain frequently associated with peptide methionine sulfoxide reductase	-1.8175
STM2688	CDS	smpB	small protein B; putative tmRNA-binding protein	-1.81272
STM1071	CDS	sulA	suppressor of lon; inhibitor of cell division and FtsZ ring formation upon DNA damage/inhibition, HslVU and Lon involved in its turnover	-1.76658
STM1119	CDS	wraB	trp-repressor binding protein	-1.76514
STM1069	CDS	ycbG	putative cytoplasmic protein	-1.75585
STM_PSLT003	CDS	repC	DNA replication	-1.74647
STM2378	CDS	fabB	3-oxoacyl-[acyl-carrier-protein] synthase I	-1.72948
STM1079	CDS	yccV	putative inner membrane protein	-1.71837
STM0982	CDS	himD	integration host factor (IHF), beta subunit; site-specific recombination	-1.71081
STM1751	CDS	hns	DNA-binding protein HLP-II (HU, BH2, HD, NS); pleiotropic regulator	-1.69258
STM2544	CDS	yfhP	believed to be involved in assembly of Fe-S clusters	-1.68612
STM3448	CDS	rpsL	30S ribosomal subunit protein S12	-1.65497
STM2030	CDS	cbiT	synthesis of vitamin B12 adenosyl cobalamide precursor	-1.65333
STM0417	CDS	ribH	riboflavin synthase, beta chain	-1.65207
STM2965	CDS	yqcC	putative cytoplasmic protein	-1.63858
STM3902	CDS	ilvM	acetolactate synthase II, small subunit	-1.60127
STM3430	CDS	rplN	50S ribosomal subunit protein L14	-1.5705
STM0186	CDS	dksA	dnaK suppressor protein	-1.5603
STM4439	CDS	cybC	cytochrome b(562)	-1.5587
STM2431	CDS	ptsH	PTS family, Hpr protein, phosphohistidinoprotein-hexose phosphotransferase	-1.52167
STM2148	CDS		putative periplasmic protein	-1.50572
STM2075	CDS	hisH	glutamine amidotransferase, subunit with HisF	-1.48404
STM_sRNA_rne5	pseudogene		pseudogene; in-frame stop following codon 97; no start near coli start	-1.48211
STM0959	CDS	lrp	regulator for lrp regulon and high-affinity branched-chain amino acid transport system; mediator of of leucine response (AsnC family)	-1.44843
STM1005	CDS		Gifsy-2 prophage; integrase	-1.40318
STM1444	CDS	slyA	transcriptional regulator for hemolysin (MarR family)	-1.39793
STM1367	CDS	ydiH	putative cytoplasmic protein	-1.3677
STM1113	CDS	scsA	Suppression of copper sensitivity: putative copper binding protein	-1.35808
STM2685	CDS	smpA	small membrane protein A	-1.35203
STM1286	CDS	mipA	scaffolding protein for murein-synthesizing holoenzyme	-1.34054
STM0141	CDS	guaC	GMP reductase	-1.33584
STM1659	CDS	ogt	O-6-alkylguanine-DNA/cysteine-protein methyltransferase	-1.30948
STM1460	CDS	ydgK	putative inner membrane protein	-1.27244
STM0307	CDS		homology to Shigella VirG protein	-1.22691
STM2355	CDS	argT	ABC superfamily (bind_prot), lysine/arginine/ornithine transport protein	-1.21937
STM3209	CDS	rpsU	30S ribosomal subunit protein S21	-1.19976
STM0807	CDS	ybhL	putative permease	-1.18588
STM0536	CDS	ppiB	peptidyl-prolyl cis-trans isomerase B (rotamase B)	-1.16142
STM1072	CDS	yccR	putative DNA transformation protein	-1.14119
STM0550	CDS	fimY	putative regulatory protein	-1.13547
STM1127	CDS		putative transcriptional regulator	-1.13066
STM3558	CDS		homology to death -on-curing protein of phage P1	-1.09793
STM1417	CDS	ssaP	Secretion system apparatus	-1.09465
STM1084	CDS	yccK	putative sulfite reductase, gamma subunit	-1.09172
STM_PSLT010	CDS		putative outer membrane protein	-1.091
STM1503	CDS	ynfB	putative periplasmic protein	-1.08758
STM0159	CDS		putative restriction endonuclease	-1.07479
STM4468	CDS	yjgK	putative cytoplasmic protein	-1.06078
STM2098	CDS	galF	putative glucose-1-phosphate uridylyltransferase (UDP-glucose pyrophosphorylase), non-catalytic subunit	-1.04349
STM1311	CDS	osmE	transcriptional activator of ntrL gene	-1.02428
STM3511	CDS	yhgI	putative Thioredoxin-like proteins and domain	-1.01875
STM2036	CDS	pocR	Propanediol utilization: transcriptional regulation, AraC family	-1.01758
STM_PSLT102	CDS	traS	conjugative transfer: surface exclusion	-1.01683
STM2967	CDS	syd	interacts with secY	-1.00889
STM3281	CDS	nlpI	lipoprotein, cell division	1.01312
STM_PSLT093	CDS		conjugative transfer:	1.05547
STM4182	CDS	metA	homoserine transsuccinylase	1.11306
STM2925	CDS	nlpD	lipoprotein	1.17365
STM0256	CDS	yafC	putative transcriptional regulator, LysR family	1.2049
STM0247	CDS	abc	putative ABC superfamily (atp_bind) transport system	1.24946
STM3901	CDS	ilvG	acetolactate synthase II, large subunit, fragment 1, cryptic	1.26913
STM2782	CDS	mig-14	putative transcription activator	1.30525
STM3402	CDS	yrdC	putative translation factor	1.44555
STM1399	CDS	sscA	Secretion system chaparone	1.47662
STM3401	CDS	aroE	dehydroshikimate reductase	1.59336
STM1412	CDS	ssaL	Secretion system apparatus	1.61871
STM4130	CDS	btuB	outer membrane receptor for transport of vitamin B12, E colicins, and bacteriophage BF23	1.62288
STM1397	CDS	sseA	Secretion system effector	1.76456
STM3897	CDS	yifA	putative transcriptional regulator, LysR family	1.78309
STM2780	CDS		homologue of pipB, putative pentapeptide repeats (8 copies)	1.80089
STM0402	CDS		putative thiol - alkyl hydroperoxide reductase	1.86041
STM0617	CDS	rna	RNase I, cleaves phosphodiester bond between any two nucleotides	1.86942
STM3888	CDS	yieP	putative regulatory protein, gntR family	2.02823
STM1398	CDS	sseB	Secretion system effector	2.09414
STM3445	CDS	tufA	protein chain elongation factor EF-Tu (duplicate of tufB)	2.09515
STM0255	CDS	yafB	2,5-diketo-D-gluconate reductase B	2.36367
STM1334.c	Entrez-CDS	infC	protein chain initiation factor IF-3	2.8696

## Sheet: 9. Stat_SmpB
Name	STM Gene type	STM Gene symbol	STM Function	Log2 (Fold change value)
CHIP7_STM2693	RNA	10Sa	regulatory RNA	-5.54024
STM1121	CDS	ymdF	putative cytoplasmic protein	-3.53192
STM1066	CDS	rmf	ribosome modulation factor (involved in dimerization of 70S ribosomes)	-3.21425
STM1119	CDS	wraB	trp-repressor binding protein	-1.86838
STM0833	CDS	ompX	outer membrane protease, receptor for phage OX2	-1.79726
STM3430	CDS	rplN	50S ribosomal subunit protein L14	-1.71265
STM1371	CDS	sufC	putative ABC superfamily (atp_bind) transport protein	-1.36915
STM1732	CDS	ompW	outer membrane protein W; colicin S4 receptor; putative transporter	-1.34042
STM3415	CDS	rpoA	RNA polymerase, alpha subunit	-1.32305
STM1661	CDS	ydaA	putative universal stress protein	-1.30992
STM3107	CDS	yggN	putative periplasmic protein	-1.25377
STM3566	CDS		putative cytoplasmic protein	-1.08301
STM0807	CDS	ybhL	putative permease	-1.08287
STM1286	CDS	mipA	scaffolding protein for murein-synthesizing holoenzyme	-1.07911
STM2322	CDS	nuoH	NADH dehydrogenase I chain H	-1.07873
STM2070	CDS	yeeZ	putative dehydratase	-1.06659
STM2665	CDS	yfiA	ribosome associated factor, stabilizes ribosomes against dissociation	-1.04735
STM1727	CDS	trpA	tryptophan synthase, alpha protein	-1.0404
STM0948	CDS		putative cytoplasmic protein	-1.03665
STM1683	CDS	tyrR	transcriptional regulator of aromatic amino acid biosynthesis genes (aroF, aroG, tyrA) and aromatic amino acid transport, has intrinsic ATPase and phosphatase activity (EBP family)	-1.02925
STM0295	CDS		putative cytoplasmic protein	1.22455
STM4240	CDS	yjbJ	putative cytoplasmic protein	1.84297

[truncated: 1 more sheets: 10. Log_SmpB]
